# Supplementary material
Source: HighWire-hosted journal article supplement (https://bmjopen.bmj.com/content/12/8/e059370)
Supplement: inline-supplementary-material-1 [file inline-supplementary-material-1.xlsx]

## Sheet: dictionari of causes
Name	Short name
Malignant neoplasms of the lung, bronchus, trachea (C33-C34)	01 Cancer
Other cancers*	02 Cancer, others
Ischemic heart diseases (I20-I25)	03 IHD
Other heart diseases**	04 Other Heart
Cerebrovascular diseases (I60-I69)	05 Cerebrovascular
Other vascular diseases***	06 Other Vascular
Diabetes mellitus (E10-E14)	07 Diabetes
Influenza (J09-J11), pneumonia (J12-J18), Tuberculosis (A15-A19)	08 IPT
Chronic obstructive pulmonary disease (J40-J44)	09 COPD
*Other cancers include lip, oral cavity, pharynx (C00-C14); esophagus (C15); stomach (C16); pancreas (C25); larynx (C32); cervix uteri (C53); kidney, renal pelvis (C64-C66); urinary bladder (C67); acute myeloid leukemia (C92.0); colon and rectum (C18-C20) and liver (C22).
**Other heart diseases include pulmonary heart disease (I26-I28), rheumatic heart disease (I00-I09) and other forms of heart diseases (I30-I51).
***Other vascular diseases include atherosclerosis (I70); aortic aneurysm (I71); other arterial disease (I72-I78).
A note on educational attainment: Estimates were done by four educational levels, but presented in the main results within three educational groups by combining the middle-low and middle-high educational groups.

## Sheet: PAF
PAFS by disease age groups and sex
		Females				Males
cause	education	35-54	55-64	65-74	75+	35-54	55-64	65-74	75+
01 Cancer	Low	0.782737	0.792151	0.643315	0.290306	0.867096	0.868241	0.893869	0.826779
01 Cancer	Medium-low	0.826242	0.833148	0.712582	0.516252	0.870248	0.875446	0.894617	0.84135
01 Cancer	Medium-high	0.8056	0.858432	0.827356	0.698852	0.846859	0.87574	0.894151	0.845784
01 Cancer	High	0.754469	0.846854	0.836104	0.65421	0.783336	0.858301	0.889788	0.829555
02 Cancer, others	Low	0.0972343	0.191217	0.076672	0.0185745	0.284727	0.271409	0.333345	0.258022
02 Cancer, others	Medium-low	0.13058	0.236846	0.102404	0.046645	0.294825	0.28574	0.332734	0.275908
02 Cancer, others	Medium-high	0.122657	0.273867	0.181171	0.0946375	0.260284	0.283697	0.332498	0.279257
02 Cancer, others	High	0.109431	0.258006	0.190388	0.0810345	0.196465	0.257081	0.326207	0.264075
03 IHD	Low	0.556427	0.298245	0.151962	0.0269254	0.588406	0.438133	0.38274	0.203566
03 IHD	Medium-low	0.627337	0.355854	0.197549	0.0662894	0.595889	0.454798	0.382738	0.219738
03 IHD	Medium-high	0.59965	0.400763	0.323204	0.13	0.549503	0.454108	0.382251	0.223791
03 IHD	High	0.540636	0.367853	0.336651	0.114806	0.446146	0.418621	0.37454	0.207929
04 Other Heart	Low	0.284406	0.157295	0.070923	0.0188969	0.384641	0.39016	0.278199	0.120543
04 Other Heart	Medium-low	0.340787	0.195347	0.0952829	0.0465567	0.385637	0.407058	0.279493	0.132603
04 Other Heart	Medium-high	0.306557	0.227183	0.165926	0.0911474	0.335789	0.405009	0.278609	0.137053
04 Other Heart	High	0.236408	0.204273	0.17635	0.083515	0.234479	0.372474	0.270057	0.122271
05 Cerebrovascular	Low	0.284406	0.157295	0.0833564	0.0101065	0.384641	0.39016	0.247003	0.0954515
05 Cerebrovascular	Medium-low	0.340787	0.195347	0.110757	0.0266367	0.385637	0.407058	0.249669	0.104991
05 Cerebrovascular	Medium-high	0.306557	0.227183	0.197572	0.0588563	0.335789	0.405009	0.248319	0.108251
05 Cerebrovascular	High	0.236408	0.204273	0.205935	0.0441328	0.234479	0.372474	0.238109	0.0971101
06 Other Vascular	Low	0.284406	0.157295	0.30333	0.0764755	0.384641	0.39016	0.634608	0.419766
06 Other Vascular	Medium-low	0.340787	0.195347	0.373945	0.178651	0.385637	0.407058	0.638057	0.448442
06 Other Vascular	Medium-high	0.306557	0.227183	0.538993	0.323908	0.335789	0.405009	0.636336	0.460117
06 Other Vascular	High	0.236408	0.204273	0.553016	0.275823	0.234479	0.372474	0.62317	0.422092
07 Diabetes	Low	0.284406	0.157295	0.0576236	0.00323528	0.384641	0.39016	0.272076	0.0311222
07 Diabetes	Medium-low	0.340787	0.195347	0.0782203	0.0080343	0.385637	0.407058	0.266153	0.0325956
07 Diabetes	Medium-high	0.306557	0.227183	0.133669	0.0158277	0.335789	0.405009	0.267908	0.0313608
07 Diabetes	High	0.236408	0.204273	0.144684	0.0153044	0.234479	0.372474	0.270597	0.0331975
08 IPT	Low	0.616335	0.674355	0.065631	0.0174407	0.638798	0.840037	0.379031	0.217634
08 IPT	Medium-low	0.68003	0.732913	0.0884402	0.0447148	0.647319	0.848593	0.377865	0.230969
08 IPT	Medium-high	0.65007	0.769956	0.153901	0.0940862	0.604321	0.848795	0.377803	0.230647
08 IPT	High	0.581491	0.764694	0.164212	0.0752539	0.506612	0.828524	0.371939	0.225156
09 COPD	Low	0.604207	0.589747	0.783422	0.294067	0.638798	0.840037	0.898476	0.829472
09 COPD	Medium-low	0.666099	0.650559	0.833305	0.517932	0.647319	0.848593	0.899198	0.84389
09 COPD	Medium-high	0.631861	0.692356	0.903297	0.695579	0.604321	0.848795	0.898749	0.8483
09 COPD	High	0.550543	0.656804	0.909958	0.660378	0.506612	0.828524	0.894548	0.832187

## Sheet: Cause-specific mortality
Smoking and non-smoking cause-specific deaths by age, education and and sex
SM=Smoking-related, NS=Non-smoking-related
age5	sex	education	cause	deaths	agegr
30	Men	Low	SM 01 Cancer	0	30-54
30	Women	Low	SM 01 Cancer	0	30-54
30	Men	Medium-low	SM 01 Cancer	0	30-54
30	Women	Medium-low	SM 01 Cancer	0	30-54
30	Men	Medium-high	SM 01 Cancer	0	30-54
30	Women	Medium-high	SM 01 Cancer	0	30-54
30	Men	High	SM 01 Cancer	0	30-54
30	Women	High	SM 01 Cancer	0	30-54
30	Men	Low	SM 02 Cancer, others	0	30-54
30	Women	Low	SM 02 Cancer, others	0	30-54
30	Men	Medium-low	SM 02 Cancer, others	0	30-54
30	Women	Medium-low	SM 02 Cancer, others	0	30-54
30	Men	Medium-high	SM 02 Cancer, others	0	30-54
30	Women	Medium-high	SM 02 Cancer, others	0	30-54
30	Men	High	SM 02 Cancer, others	0	30-54
30	Women	High	SM 02 Cancer, others	0	30-54
30	Men	Low	SM 03 IHD	0	30-54
30	Women	Low	SM 03 IHD	0	30-54
30	Men	Medium-low	SM 03 IHD	0	30-54
30	Women	Medium-low	SM 03 IHD	0	30-54
30	Men	Medium-high	SM 03 IHD	0	30-54
30	Women	Medium-high	SM 03 IHD	0	30-54
30	Men	High	SM 03 IHD	0	30-54
30	Women	High	SM 03 IHD	0	30-54
30	Men	Low	SM 04 Other Heart	0	30-54
30	Women	Low	SM 04 Other Heart	0	30-54
30	Men	Medium-low	SM 04 Other Heart	0	30-54
30	Women	Medium-low	SM 04 Other Heart	0	30-54
30	Men	Medium-high	SM 04 Other Heart	0	30-54
30	Women	Medium-high	SM 04 Other Heart	0	30-54
30	Men	High	SM 04 Other Heart	0	30-54
30	Women	High	SM 04 Other Heart	0	30-54
30	Men	Low	SM 05 Cerebrovascular	0	30-54
30	Women	Low	SM 05 Cerebrovascular	0	30-54
30	Men	Medium-low	SM 05 Cerebrovascular	0	30-54
30	Women	Medium-low	SM 05 Cerebrovascular	0	30-54
30	Men	Medium-high	SM 05 Cerebrovascular	0	30-54
30	Women	Medium-high	SM 05 Cerebrovascular	0	30-54
30	Men	High	SM 05 Cerebrovascular	0	30-54
30	Women	High	SM 05 Cerebrovascular	0	30-54
30	Men	Low	SM 06 Other Vascular	0	30-54
30	Women	Low	SM 06 Other Vascular	0	30-54
30	Men	Medium-low	SM 06 Other Vascular	0	30-54
30	Women	Medium-low	SM 06 Other Vascular	0	30-54
30	Men	Medium-high	SM 06 Other Vascular	0	30-54
30	Women	Medium-high	SM 06 Other Vascular	0	30-54
30	Men	High	SM 06 Other Vascular	0	30-54
30	Women	High	SM 06 Other Vascular	0	30-54
30	Men	Low	SM 07 Diabetes	0	30-54
30	Women	Low	SM 07 Diabetes	0	30-54
30	Men	Medium-low	SM 07 Diabetes	0	30-54
30	Women	Medium-low	SM 07 Diabetes	0	30-54
30	Men	Medium-high	SM 07 Diabetes	0	30-54
30	Women	Medium-high	SM 07 Diabetes	0	30-54
30	Men	High	SM 07 Diabetes	0	30-54
30	Women	High	SM 07 Diabetes	0	30-54
30	Men	Low	SM 08 IPT	0	30-54
30	Women	Low	SM 08 IPT	0	30-54
30	Men	Medium-low	SM 08 IPT	0	30-54
30	Women	Medium-low	SM 08 IPT	0	30-54
30	Men	Medium-high	SM 08 IPT	0	30-54
30	Women	Medium-high	SM 08 IPT	0	30-54
30	Men	High	SM 08 IPT	0	30-54
30	Women	High	SM 08 IPT	0	30-54
30	Men	Low	SM 09 COPD	0	30-54
30	Women	Low	SM 09 COPD	0	30-54
30	Men	Medium-low	SM 09 COPD	0	30-54
30	Women	Medium-low	SM 09 COPD	0	30-54
30	Men	Medium-high	SM 09 COPD	0	30-54
30	Women	Medium-high	SM 09 COPD	0	30-54
30	Men	High	SM 09 COPD	0	30-54
30	Women	High	SM 09 COPD	0	30-54
30	Men	Low	SM Other (non-smoking-related)	0	30-54
30	Women	Low	SM Other (non-smoking-related)	0	30-54
30	Men	Medium-low	SM Other (non-smoking-related)	0	30-54
30	Women	Medium-low	SM Other (non-smoking-related)	0	30-54
30	Men	Medium-high	SM Other (non-smoking-related)	0	30-54
30	Women	Medium-high	SM Other (non-smoking-related)	0	30-54
30	Men	High	SM Other (non-smoking-related)	0	30-54
30	Women	High	SM Other (non-smoking-related)	0	30-54
30	Men	Low	NS 01 Cancer	2.38095	30-54
30	Women	Low	NS 01 Cancer	4.47059	30-54
30	Men	Medium-low	NS 01 Cancer	8.33333	30-54
30	Women	Medium-low	NS 01 Cancer	8.94118	30-54
30	Men	Medium-high	NS 01 Cancer	10.7143	30-54
30	Women	Medium-high	NS 01 Cancer	1.11765	30-54
30	Men	High	NS 01 Cancer	3.57143	30-54
30	Women	High	NS 01 Cancer	4.47059	30-54
30	Men	Low	NS 02 Cancer, others	22.8767	30-54
30	Women	Low	NS 02 Cancer, others	16.875	30-54
30	Men	Medium-low	NS 02 Cancer, others	57.1918	30-54
30	Women	Medium-low	NS 02 Cancer, others	49.5	30-54
30	Men	Medium-high	NS 02 Cancer, others	42.3219	30-54
30	Women	Medium-high	NS 02 Cancer, others	30.375	30-54
30	Men	High	NS 02 Cancer, others	44.6096	30-54
30	Women	High	NS 02 Cancer, others	56.25	30-54
30	Men	Low	NS 03 IHD	16.039	30-54
30	Women	Low	NS 03 IHD	1.14286	30-54
30	Men	Medium-low	NS 03 IHD	39.4805	30-54
30	Women	Medium-low	NS 03 IHD	5.71429	30-54
30	Men	Medium-high	NS 03 IHD	22.2078	30-54
30	Women	Medium-high	NS 03 IHD	3.42857	30-54
30	Men	High	NS 03 IHD	17.2727	30-54
30	Women	High	NS 03 IHD	5.71429	30-54
30	Men	Low	NS 04 Other Heart	35.7135	30-54
30	Women	Low	NS 04 Other Heart	16.2703	30-54
30	Men	Medium-low	NS 04 Other Heart	85.2515	30-54
30	Women	Medium-low	NS 04 Other Heart	34.8649	30-54
30	Men	Medium-high	NS 04 Other Heart	38.0175	30-54
30	Women	Medium-high	NS 04 Other Heart	13.9459	30-54
30	Men	High	NS 04 Other Heart	38.0175	30-54
30	Women	High	NS 04 Other Heart	20.9189	30-54
30	Men	Low	NS 05 Cerebrovascular	11.7308	30-54
30	Women	Low	NS 05 Cerebrovascular	4.73684	30-54
30	Men	Medium-low	NS 05 Cerebrovascular	28.1538	30-54
30	Women	Medium-low	NS 05 Cerebrovascular	13.0263	30-54
30	Men	Medium-high	NS 05 Cerebrovascular	11.7308	30-54
30	Women	Medium-high	NS 05 Cerebrovascular	13.0263	30-54
30	Men	High	NS 05 Cerebrovascular	9.38462	30-54
30	Women	High	NS 05 Cerebrovascular	14.2105	30-54
30	Men	Low	NS 06 Other Vascular	1.33333	30-54
30	Women	Low	NS 06 Other Vascular	0	30-54
30	Men	Medium-low	NS 06 Other Vascular	4	30-54
30	Women	Medium-low	NS 06 Other Vascular	1.16667	30-54
30	Men	Medium-high	NS 06 Other Vascular	2.66667	30-54
30	Women	Medium-high	NS 06 Other Vascular	0	30-54
30	Men	High	NS 06 Other Vascular	4	30-54
30	Women	High	NS 06 Other Vascular	5.83333	30-54
30	Men	Low	NS 07 Diabetes	2	30-54
30	Women	Low	NS 07 Diabetes	1	30-54
30	Men	Medium-low	NS 07 Diabetes	2	30-54
30	Women	Medium-low	NS 07 Diabetes	4	30-54
30	Men	Medium-high	NS 07 Diabetes	2	30-54
30	Women	Medium-high	NS 07 Diabetes	1	30-54
30	Men	High	NS 07 Diabetes	2	30-54
30	Women	High	NS 07 Diabetes	2	30-54
30	Men	Low	NS 08 IPT	13.3333	30-54
30	Women	Low	NS 08 IPT	11.4583	30-54
30	Men	Medium-low	NS 08 IPT	8	30-54
30	Women	Medium-low	NS 08 IPT	7.29167	30-54
30	Men	Medium-high	NS 08 IPT	4	30-54
30	Women	Medium-high	NS 08 IPT	4.16667	30-54
30	Men	High	NS 08 IPT	2.66667	30-54
30	Women	High	NS 08 IPT	2.08333	30-54
30	Men	Low	NS 09 COPD	2.66667	30-54
30	Women	Low	NS 09 COPD	0	30-54
30	Men	Medium-low	NS 09 COPD	1.33333	30-54
30	Women	Medium-low	NS 09 COPD	1	30-54
30	Men	Medium-high	NS 09 COPD	0	30-54
30	Women	Medium-high	NS 09 COPD	0	30-54
30	Men	High	NS 09 COPD	0	30-54
30	Women	High	NS 09 COPD	1	30-54
30	Men	Low	NS Other (non-smoking-related)	446.94	30-54
30	Women	Low	NS Other (non-smoking-related)	189.073	30-54
30	Men	Medium-low	NS Other (non-smoking-related)	1184.02	30-54
30	Women	Medium-low	NS Other (non-smoking-related)	301.589	30-54
30	Men	Medium-high	NS Other (non-smoking-related)	466.694	30-54
30	Women	Medium-high	NS Other (non-smoking-related)	221.552	30-54
30	Men	High	NS Other (non-smoking-related)	454.347	30-54
30	Women	High	NS Other (non-smoking-related)	353.787	30-54
35	Men	Low	SM 01 Cancer	7.2088	30-54
35	Women	Low	SM 01 Cancer	4.00577	30-54
35	Men	Medium-low	SM 01 Cancer	49.7406	30-54
35	Women	Medium-low	SM 01 Cancer	30.4446	30-54
35	Men	Medium-high	SM 01 Cancer	14.9612	30-54
35	Women	Medium-high	SM 01 Cancer	13.1929	30-54
35	Men	High	SM 01 Cancer	17.9092	30-54
35	Women	High	SM 01 Cancer	21.6222	30-54
35	Men	Low	SM 02 Cancer, others	17.8571	30-54
35	Women	Low	SM 02 Cancer, others	3.1373	30-54
35	Men	Medium-low	SM 02 Cancer, others	43.5622	30-54
35	Women	Medium-low	SM 02 Cancer, others	13.7269	30-54
35	Men	Medium-high	SM 02 Cancer, others	22.1344	30-54
35	Women	Medium-high	SM 02 Cancer, others	9.44708	30-54
35	Men	High	SM 02 Cancer, others	21.5106	30-54
35	Women	High	SM 02 Cancer, others	15.604	30-54
35	Men	Low	SM 03 IHD	18.0596	30-54
35	Women	Low	SM 03 IHD	4.73404	30-54
35	Men	Medium-low	SM 03 IHD	80.3419	30-54
35	Women	Medium-low	SM 03 IHD	18.6807	30-54
35	Men	Medium-high	SM 03 IHD	35.538	30-54
35	Women	Medium-high	SM 03 IHD	10.8413	30-54
35	Men	High	SM 03 IHD	24.4522	30-54
35	Women	High	SM 03 IHD	5.74962	30-54
35	Men	Low	SM 04 Other Heart	23.9349	30-54
35	Women	Low	SM 04 Other Heart	4.6069	30-54
35	Men	Medium-low	SM 04 Other Heart	59.5308	30-54
35	Women	Medium-low	SM 04 Other Heart	19.3206	30-54
35	Men	Medium-high	SM 04 Other Heart	28.5298	30-54
35	Women	Medium-high	SM 04 Other Heart	8.15797	30-54
35	Men	High	SM 04 Other Heart	13.4685	30-54
35	Women	High	SM 04 Other Heart	9.57355	30-54
35	Men	Low	SM 05 Cerebrovascular	7.83796	30-54
35	Women	Low	SM 05 Cerebrovascular	2.43776	30-54
35	Men	Medium-low	SM 05 Cerebrovascular	22.2651	30-54
35	Women	Medium-low	SM 05 Cerebrovascular	9.49335	30-54
35	Men	Medium-high	SM 05 Cerebrovascular	7.22263	30-54
35	Women	Medium-high	SM 05 Cerebrovascular	5.58372	30-54
35	Men	High	SM 05 Cerebrovascular	4.77807	30-54
35	Women	High	SM 05 Cerebrovascular	4.81259	30-54
35	Men	Low	SM 06 Other Vascular	2.14175	30-54
35	Women	Low	SM 06 Other Vascular	1.59978	30-54
35	Men	Medium-low	SM 06 Other Vascular	11.166	30-54
35	Women	Medium-low	SM 06 Other Vascular	0.76677	30-54
35	Men	Medium-high	SM 06 Other Vascular	2.61763	30-54
35	Women	Medium-high	SM 06 Other Vascular	1.03463	30-54
35	Men	High	SM 06 Other Vascular	1.56675	30-54
35	Women	High	SM 06 Other Vascular	1.59575	30-54
35	Men	Low	SM 07 Diabetes	2.07706	30-54
35	Women	Low	SM 07 Diabetes	0.616213	30-54
35	Men	Medium-low	SM 07 Diabetes	5.41435	30-54
35	Women	Medium-low	SM 07 Diabetes	2.21511	30-54
35	Men	Medium-high	SM 07 Diabetes	2.53857	30-54
35	Women	Medium-high	SM 07 Diabetes	0.996311	30-54
35	Men	High	SM 07 Diabetes	0	30-54
35	Women	High	SM 07 Diabetes	0.256109	30-54
35	Men	Low	SM 08 IPT	6.75529	30-54
35	Women	Low	SM 08 IPT	9.24503	30-54
35	Men	Medium-low	SM 08 IPT	14.4514	30-54
35	Women	Medium-low	SM 08 IPT	10.2004	30-54
35	Men	Medium-high	SM 08 IPT	4.26046	30-54
35	Women	Medium-high	SM 08 IPT	5.85063	30-54
35	Men	High	SM 08 IPT	3.57162	30-54
35	Women	High	SM 08 IPT	4.65193	30-54
35	Men	Low	SM 09 COPD	2.87459	30-54
35	Women	Low	SM 09 COPD	0.604207	30-54
35	Men	Medium-low	SM 09 COPD	0.728234	30-54
35	Women	Medium-low	SM 09 COPD	0.666099	30-54
35	Men	Medium-high	SM 09 COPD	0.679861	30-54
35	Women	Medium-high	SM 09 COPD	0.631861	30-54
35	Men	High	SM 09 COPD	1.13988	30-54
35	Women	High	SM 09 COPD	0.550543	30-54
35	Men	Low	SM Other (non-smoking-related)	0	30-54
35	Women	Low	SM Other (non-smoking-related)	0	30-54
35	Men	Medium-low	SM Other (non-smoking-related)	0	30-54
35	Women	Medium-low	SM Other (non-smoking-related)	0	30-54
35	Men	Medium-high	SM Other (non-smoking-related)	0	30-54
35	Women	Medium-high	SM Other (non-smoking-related)	0	30-54
35	Men	High	SM Other (non-smoking-related)	0	30-54
35	Women	High	SM Other (non-smoking-related)	0	30-54
35	Men	Low	NS 01 Cancer	1.10492	30-54
35	Women	Low	NS 01 Cancer	1.11187	30-54
35	Men	Medium-low	NS 01 Cancer	7.41623	30-54
35	Women	Medium-low	NS 01 Cancer	6.40248	30-54
35	Men	Medium-high	NS 01 Cancer	2.70549	30-54
35	Women	Medium-high	NS 01 Cancer	3.18358	30-54
35	Men	High	NS 01 Cancer	4.95353	30-54
35	Women	High	NS 01 Cancer	7.03664	30-54
35	Men	Low	NS 02 Cancer, others	44.8595	30-54
35	Women	Low	NS 02 Cancer, others	29.128	30-54
35	Men	Medium-low	NS 02 Cancer, others	104.194	30-54
35	Women	Medium-low	NS 02 Cancer, others	91.3956	30-54
35	Men	Medium-high	NS 02 Cancer, others	62.905	30-54
35	Women	Medium-high	NS 02 Cancer, others	67.5733	30-54
35	Men	High	NS 02 Cancer, others	87.9776	30-54
35	Women	High	NS 02 Cancer, others	126.988	30-54
35	Men	Low	NS 03 IHD	12.6328	30-54
35	Women	Low	NS 03 IHD	3.77389	30-54
35	Men	Medium-low	NS 03 IHD	54.485	30-54
35	Women	Medium-low	NS 03 IHD	11.0971	30-54
35	Men	Medium-high	NS 03 IHD	29.1351	30-54
35	Women	Medium-high	NS 03 IHD	7.23807	30-54
35	Men	High	NS 03 IHD	30.3554	30-54
35	Women	High	NS 03 IHD	4.8853	30-54
35	Men	Low	NS 04 Other Heart	38.2918	30-54
35	Women	Low	NS 04 Other Heart	11.5914	30-54
35	Men	Medium-low	NS 04 Other Heart	94.8392	30-54
35	Women	Medium-low	NS 04 Other Heart	37.3736	30-54
35	Men	Medium-high	NS 04 Other Heart	56.4336	30-54
35	Women	Medium-high	NS 04 Other Heart	18.4536	30-54
35	Men	High	NS 04 Other Heart	43.9715	30-54
35	Women	High	NS 04 Other Heart	30.9223	30-54
35	Men	Low	NS 05 Cerebrovascular	12.5394	30-54
35	Women	Low	NS 05 Cerebrovascular	6.13366	30-54
35	Men	Medium-low	NS 05 Cerebrovascular	35.4707	30-54
35	Women	Medium-low	NS 05 Cerebrovascular	18.3638	30-54
35	Men	Medium-high	NS 05 Cerebrovascular	14.2868	30-54
35	Women	Medium-high	NS 05 Cerebrovascular	12.6306	30-54
35	Men	High	NS 05 Cerebrovascular	15.5993	30-54
35	Women	High	NS 05 Cerebrovascular	15.5446	30-54
35	Men	Low	NS 06 Other Vascular	3.42643	30-54
35	Women	Low	NS 06 Other Vascular	4.02522	30-54
35	Men	Medium-low	NS 06 Other Vascular	17.7886	30-54
35	Women	Medium-low	NS 06 Other Vascular	1.48323	30-54
35	Men	Medium-high	NS 06 Other Vascular	5.17783	30-54
35	Women	Medium-high	NS 06 Other Vascular	2.34037	30-54
35	Men	High	NS 06 Other Vascular	5.11507	30-54
35	Women	High	NS 06 Other Vascular	5.15425	30-54
35	Men	Low	NS 07 Diabetes	3.32294	30-54
35	Women	Low	NS 07 Diabetes	1.55045	30-54
35	Men	Medium-low	NS 07 Diabetes	8.62565	30-54
35	Women	Medium-low	NS 07 Diabetes	4.28489	30-54
35	Men	Medium-high	NS 07 Diabetes	5.02143	30-54
35	Women	Medium-high	NS 07 Diabetes	2.25369	30-54
35	Men	High	NS 07 Diabetes	0	30-54
35	Women	High	NS 07 Diabetes	0.827225	30-54
35	Men	Low	NS 08 IPT	3.81971	30-54
35	Women	Low	NS 08 IPT	5.75497	30-54
35	Men	Medium-low	NS 08 IPT	7.87361	30-54
35	Women	Medium-low	NS 08 IPT	4.79955	30-54
35	Men	Medium-high	NS 08 IPT	2.78954	30-54
35	Women	Medium-high	NS 08 IPT	3.14937	30-54
35	Men	High	NS 08 IPT	3.47838	30-54
35	Women	High	NS 08 IPT	3.34807	30-54
35	Men	Low	NS 09 COPD	1.62541	30-54
35	Women	Low	NS 09 COPD	0.395793	30-54
35	Men	Medium-low	NS 09 COPD	0.396766	30-54
35	Women	Medium-low	NS 09 COPD	0.333901	30-54
35	Men	Medium-high	NS 09 COPD	0.445139	30-54
35	Women	Medium-high	NS 09 COPD	0.368139	30-54
35	Men	High	NS 09 COPD	1.11012	30-54
35	Women	High	NS 09 COPD	0.449457	30-54
35	Men	Low	NS Other (non-smoking-related)	542.593	30-54
35	Women	Low	NS Other (non-smoking-related)	293.174	30-54
35	Men	Medium-low	NS Other (non-smoking-related)	1592.88	30-54
35	Women	Medium-low	NS Other (non-smoking-related)	536.059	30-54
35	Men	Medium-high	NS Other (non-smoking-related)	866.799	30-54
35	Women	Medium-high	NS Other (non-smoking-related)	434.411	30-54
35	Men	High	NS Other (non-smoking-related)	749.725	30-54
35	Women	High	NS Other (non-smoking-related)	739.355	30-54
40	Men	Low	SM 01 Cancer	39.1651	30-54
40	Women	Low	SM 01 Cancer	9.82697	30-54
40	Men	Medium-low	SM 01 Cancer	142.604	30-54
40	Women	Medium-low	SM 01 Cancer	63.1033	30-54
40	Men	Medium-high	SM 01 Cancer	71.1646	30-54
40	Women	Medium-high	SM 01 Cancer	43.8274	30-54
40	Men	High	SM 01 Cancer	64.1809	30-54
40	Women	High	SM 01 Cancer	79.7232	30-54
40	Men	Low	SM 02 Cancer, others	31.4717	30-54
40	Women	Low	SM 02 Cancer, others	9.06108	30-54
40	Men	Medium-low	SM 02 Cancer, others	97.7639	30-54
40	Women	Medium-low	SM 02 Cancer, others	26.4765	30-54
40	Men	Medium-high	SM 02 Cancer, others	48.7719	30-54
40	Women	Medium-high	SM 02 Cancer, others	17.8361	30-54
40	Men	High	SM 02 Cancer, others	45.0863	30-54
40	Women	High	SM 02 Cancer, others	30.9292	30-54
40	Men	Low	SM 03 IHD	49.9872	30-54
40	Women	Low	SM 03 IHD	10.5165	30-54
40	Men	Medium-low	SM 03 IHD	201.834	30-54
40	Women	Medium-low	SM 03 IHD	30.3004	30-54
40	Men	Medium-high	SM 03 IHD	89.7269	30-54
40	Women	Medium-high	SM 03 IHD	20.1482	30-54
40	Men	High	SM 03 IHD	66.9433	30-54
40	Women	High	SM 03 IHD	13.624	30-54
40	Men	Low	SM 04 Other Heart	39.0603	30-54
40	Women	Low	SM 04 Other Heart	8.93508	30-54
40	Men	Medium-low	SM 04 Other Heart	103.012	30-54
40	Women	Medium-low	SM 04 Other Heart	27.3197	30-54
40	Men	Medium-high	SM 04 Other Heart	46.7014	30-54
40	Women	Medium-high	SM 04 Other Heart	16.6052	30-54
40	Men	High	SM 04 Other Heart	30.5407	30-54
40	Women	High	SM 04 Other Heart	16.1349	30-54
40	Men	Low	SM 05 Cerebrovascular	13.6419	30-54
40	Women	Low	SM 05 Cerebrovascular	7.05985	30-54
40	Men	Medium-low	SM 05 Cerebrovascular	44.0237	30-54
40	Women	Medium-low	SM 05 Cerebrovascular	19.1256	30-54
40	Men	Medium-high	SM 05 Cerebrovascular	19.7248	30-54
40	Women	Medium-high	SM 05 Cerebrovascular	10.2566	30-54
40	Men	High	SM 05 Cerebrovascular	13.5138	30-54
40	Women	High	SM 05 Cerebrovascular	14.7986	30-54
40	Men	Low	SM 06 Other Vascular	5.93445	30-54
40	Women	Low	SM 06 Other Vascular	1.21888	30-54
40	Men	Medium-low	SM 06 Other Vascular	7.93311	30-54
40	Women	Medium-low	SM 06 Other Vascular	3.65129	30-54
40	Men	Medium-high	SM 06 Other Vascular	7.94381	30-54
40	Women	Medium-high	SM 06 Other Vascular	0.985362	30-54
40	Men	High	SM 06 Other Vascular	2.89415	30-54
40	Women	High	SM 06 Other Vascular	2.78624	30-54
40	Men	Low	SM 07 Diabetes	3.33355	30-54
40	Women	Low	SM 07 Diabetes	1.18933	30-54
40	Men	Medium-low	SM 07 Diabetes	9.6088	30-54
40	Women	Medium-low	SM 07 Diabetes	3.56277	30-54
40	Men	Medium-high	SM 07 Diabetes	3.27394	30-54
40	Women	Medium-high	SM 07 Diabetes	1.28197	30-54
40	Men	High	SM 07 Diabetes	2.03216	30-54
40	Women	High	SM 07 Diabetes	0.988616	30-54
40	Men	Low	SM 08 IPT	20.259	30-54
40	Women	Low	SM 08 IPT	11.3968	30-54
40	Men	Medium-low	SM 08 IPT	27.1279	30-54
40	Women	Medium-low	SM 08 IPT	14.0539	30-54
40	Men	Medium-high	SM 08 IPT	10.2673	30-54
40	Women	Medium-high	SM 08 IPT	7.07093	30-54
40	Men	High	SM 08 IPT	10.3287	30-54
40	Women	High	SM 08 IPT	6.95749	30-54
40	Men	Low	SM 09 COPD	6.57049	30-54
40	Women	Low	SM 09 COPD	4.5819	30-54
40	Men	Medium-low	SM 09 COPD	7.39793	30-54
40	Women	Medium-low	SM 09 COPD	0.721608	30-54
40	Men	Medium-high	SM 09 COPD	1.3813	30-54
40	Women	Medium-high	SM 09 COPD	1.36903	30-54
40	Men	High	SM 09 COPD	0	30-54
40	Women	High	SM 09 COPD	1.19284	30-54
40	Men	Low	SM Other (non-smoking-related)	0	30-54
40	Women	Low	SM Other (non-smoking-related)	0	30-54
40	Men	Medium-low	SM Other (non-smoking-related)	0	30-54
40	Women	Medium-low	SM Other (non-smoking-related)	0	30-54
40	Men	Medium-high	SM Other (non-smoking-related)	0	30-54
40	Women	Medium-high	SM Other (non-smoking-related)	0	30-54
40	Men	High	SM Other (non-smoking-related)	0	30-54
40	Women	High	SM Other (non-smoking-related)	0	30-54
40	Men	Low	NS 01 Cancer	6.003	30-54
40	Women	Low	NS 01 Cancer	2.72765	30-54
40	Men	Medium-low	NS 01 Cancer	21.2619	30-54
40	Women	Medium-low	NS 01 Cancer	13.2706	30-54
40	Men	Medium-high	NS 01 Cancer	12.869	30-54
40	Women	Medium-high	NS 01 Cancer	10.576	30-54
40	Men	High	NS 01 Cancer	17.7519	30-54
40	Women	High	NS 01 Cancer	25.9448	30-54
40	Men	Low	NS 02 Cancer, others	79.0614	30-54
40	Women	Low	NS 02 Cancer, others	84.127	30-54
40	Men	Medium-low	NS 02 Cancer, others	233.835	30-54
40	Women	Medium-low	NS 02 Cancer, others	176.284	30-54
40	Men	Medium-high	NS 02 Cancer, others	138.608	30-54
40	Women	Medium-high	NS 02 Cancer, others	127.578	30-54
40	Men	High	NS 02 Cancer, others	184.401	30-54
40	Women	High	NS 02 Cancer, others	251.707	30-54
40	Men	Low	NS 03 IHD	34.9664	30-54
40	Women	Low	NS 03 IHD	8.38353	30-54
40	Men	Medium-low	NS 03 IHD	136.877	30-54
40	Women	Medium-low	NS 03 IHD	17.9996	30-54
40	Men	Medium-high	NS 03 IHD	73.5606	30-54
40	Women	Medium-high	NS 03 IHD	13.4518	30-54
40	Men	High	NS 03 IHD	83.1046	30-54
40	Women	High	NS 03 IHD	11.576	30-54
40	Men	Low	NS 04 Other Heart	62.4899	30-54
40	Women	Low	NS 04 Other Heart	22.4816	30-54
40	Men	Medium-low	NS 04 Other Heart	164.109	30-54
40	Women	Medium-low	NS 04 Other Heart	52.8469	30-54
40	Men	Medium-high	NS 04 Other Heart	92.3782	30-54
40	Women	Medium-high	NS 04 Other Heart	37.5615	30-54
40	Men	High	NS 04 Other Heart	99.7084	30-54
40	Women	High	NS 04 Other Heart	52.1151	30-54
40	Men	Low	NS 05 Cerebrovascular	21.8247	30-54
40	Women	Low	NS 05 Cerebrovascular	17.7633	30-54
40	Men	Medium-low	NS 05 Cerebrovascular	70.1346	30-54
40	Women	Medium-low	NS 05 Cerebrovascular	36.9963	30-54
40	Men	Medium-high	NS 05 Cerebrovascular	39.0169	30-54
40	Women	Medium-high	NS 05 Cerebrovascular	23.2007	30-54
40	Men	High	NS 05 Cerebrovascular	44.1195	30-54
40	Women	High	NS 05 Cerebrovascular	47.799	30-54
40	Men	Low	NS 06 Other Vascular	9.49412	30-54
40	Women	Low	NS 06 Other Vascular	3.06683	30-54
40	Men	Medium-low	NS 06 Other Vascular	12.6383	30-54
40	Women	Medium-low	NS 06 Other Vascular	7.063	30-54
40	Men	Medium-high	NS 06 Other Vascular	15.7133	30-54
40	Women	Medium-high	NS 06 Other Vascular	2.22892	30-54
40	Men	High	NS 06 Other Vascular	9.44871	30-54
40	Women	High	NS 06 Other Vascular	8.99948	30-54
40	Men	Low	NS 07 Diabetes	5.33312	30-54
40	Women	Low	NS 07 Diabetes	2.99248	30-54
40	Men	Medium-low	NS 07 Diabetes	15.3079	30-54
40	Women	Medium-low	NS 07 Diabetes	6.89177	30-54
40	Men	Medium-high	NS 07 Diabetes	6.47606	30-54
40	Women	Medium-high	NS 07 Diabetes	2.89985	30-54
40	Men	High	NS 07 Diabetes	6.63451	30-54
40	Women	High	NS 07 Diabetes	3.1932	30-54
40	Men	Low	NS 08 IPT	11.4553	30-54
40	Women	Low	NS 08 IPT	7.09443	30-54
40	Men	Medium-low	NS 08 IPT	14.7802	30-54
40	Women	Medium-low	NS 08 IPT	6.61272	30-54
40	Men	Medium-high	NS 08 IPT	6.72251	30-54
40	Women	Medium-high	NS 08 IPT	3.80626	30-54
40	Men	High	NS 08 IPT	10.0591	30-54
40	Women	High	NS 08 IPT	5.00743	30-54
40	Men	Low	NS 09 COPD	3.71522	30-54
40	Women	Low	NS 09 COPD	3.00143	30-54
40	Men	Medium-low	NS 09 COPD	4.03064	30-54
40	Women	Medium-low	NS 09 COPD	0.361726	30-54
40	Men	Medium-high	NS 09 COPD	0.904409	30-54
40	Women	Medium-high	NS 09 COPD	0.797634	30-54
40	Men	High	NS 09 COPD	0	30-54
40	Women	High	NS 09 COPD	0.973824	30-54
40	Men	Low	NS Other (non-smoking-related)	885.363	30-54
40	Women	Low	NS Other (non-smoking-related)	486.575	30-54
40	Men	Medium-low	NS Other (non-smoking-related)	2386.54	30-54
40	Women	Medium-low	NS Other (non-smoking-related)	916.031	30-54
40	Men	Medium-high	NS Other (non-smoking-related)	1179.02	30-54
40	Women	Medium-high	NS Other (non-smoking-related)	665.339	30-54
40	Men	High	NS Other (non-smoking-related)	1191.08	30-54
40	Women	High	NS Other (non-smoking-related)	1246.06	30-54
45	Men	Low	SM 01 Cancer	130.134	30-54
45	Women	Low	SM 01 Cancer	55.4149	30-54
45	Men	Medium-low	SM 01 Cancer	451.684	30-54
45	Women	Medium-low	SM 01 Cancer	212.786	30-54
45	Men	Medium-high	SM 01 Cancer	201.237	30-54
45	Women	Medium-high	SM 01 Cancer	133.905	30-54
45	Men	High	SM 01 Cancer	140.423	30-54
45	Women	High	SM 01 Cancer	132.373	30-54
45	Men	Low	SM 02 Cancer, others	96.2605	30-54
45	Women	Low	SM 02 Cancer, others	15.8652	30-54
45	Men	Medium-low	SM 02 Cancer, others	261.646	30-54
45	Women	Medium-low	SM 02 Cancer, others	55.1527	30-54
45	Men	Medium-high	SM 02 Cancer, others	124.483	30-54
45	Women	Medium-high	SM 02 Cancer, others	34.4531	30-54
45	Men	High	SM 02 Cancer, others	93.5563	30-54
45	Women	High	SM 02 Cancer, others	50.4015	30-54
45	Men	Low	SM 03 IHD	103.498	30-54
45	Women	Low	SM 03 IHD	28.7473	30-54
45	Men	Medium-low	SM 03 IHD	402.223	30-54
45	Women	Medium-low	SM 03 IHD	77.9238	30-54
45	Men	Medium-high	SM 03 IHD	188.477	30-54
45	Women	Medium-high	SM 03 IHD	37.572	30-54
45	Men	High	SM 03 IHD	138.802	30-54
45	Women	High	SM 03 IHD	26.7429	30-54
45	Men	Low	SM 04 Other Heart	63.3325	30-54
45	Women	Low	SM 04 Other Heart	22.4112	30-54
45	Men	Medium-low	SM 04 Other Heart	185.895	30-54
45	Women	Medium-low	SM 04 Other Heart	48.8594	30-54
45	Men	Medium-high	SM 04 Other Heart	77.1135	30-54
45	Women	Medium-high	SM 04 Other Heart	27.5118	30-54
45	Men	High	SM 04 Other Heart	44.7039	30-54
45	Women	High	SM 04 Other Heart	19.4052	30-54
45	Men	Low	SM 05 Cerebrovascular	34.9008	30-54
45	Women	Low	SM 05 Cerebrovascular	13.8119	30-54
45	Men	Medium-low	SM 05 Cerebrovascular	83.5674	30-54
45	Women	Medium-low	SM 05 Cerebrovascular	42.4542	30-54
45	Men	Medium-high	SM 05 Cerebrovascular	37.6372	30-54
45	Women	Medium-high	SM 05 Cerebrovascular	16.8295	30-54
45	Men	High	SM 05 Cerebrovascular	24.0291	30-54
45	Women	High	SM 05 Cerebrovascular	22.2131	30-54
45	Men	Low	SM 06 Other Vascular	11.4559	30-54
45	Women	Low	SM 06 Other Vascular	1.42203	30-54
45	Men	Medium-low	SM 06 Other Vascular	23.7916	30-54
45	Women	Medium-low	SM 06 Other Vascular	5.45259	30-54
45	Men	Medium-high	SM 06 Other Vascular	9.2866	30-54
45	Women	Medium-high	SM 06 Other Vascular	3.37213	30-54
45	Men	High	SM 06 Other Vascular	11.2237	30-54
45	Women	High	SM 06 Other Vascular	2.60049	30-54
45	Men	Low	SM 07 Diabetes	10.4852	30-54
45	Women	Low	SM 07 Diabetes	2.25629	30-54
45	Men	Medium-low	SM 07 Diabetes	17.1312	30-54
45	Women	Medium-low	SM 07 Diabetes	5.40715	30-54
45	Men	Medium-high	SM 07 Diabetes	6.10232	30-54
45	Women	Medium-high	SM 07 Diabetes	2.43202	30-54
45	Men	High	SM 07 Diabetes	3.55101	30-54
45	Women	High	SM 07 Diabetes	0.535858	30-54
45	Men	Low	SM 08 IPT	40.789	30-54
45	Women	Low	SM 08 IPT	15.8122	30-54
45	Men	Medium-low	SM 08 IPT	66.5533	30-54
45	Women	Medium-low	SM 08 IPT	25.4425	30-54
45	Men	Medium-high	SM 08 IPT	32.0473	30-54
45	Women	Medium-high	SM 08 IPT	9.72863	30-54
45	Men	High	SM 08 IPT	15.3519	30-54
45	Women	High	SM 08 IPT	8.70231	30-54
45	Men	Low	SM 09 COPD	20.4684	30-54
45	Women	Low	SM 09 COPD	5.28681	30-54
45	Men	Medium-low	SM 09 COPD	40.1446	30-54
45	Women	Medium-low	SM 09 COPD	9.4711	30-54
45	Men	Medium-high	SM 09 COPD	10.6188	30-54
45	Women	Medium-high	SM 09 COPD	5.52879	30-54
45	Men	High	SM 09 COPD	5.76005	30-54
45	Women	High	SM 09 COPD	1.80647	30-54
45	Men	Low	SM Other (non-smoking-related)	0	30-54
45	Women	Low	SM Other (non-smoking-related)	0	30-54
45	Men	Medium-low	SM Other (non-smoking-related)	0	30-54
45	Women	Medium-low	SM Other (non-smoking-related)	0	30-54
45	Men	Medium-high	SM Other (non-smoking-related)	0	30-54
45	Women	Medium-high	SM Other (non-smoking-related)	0	30-54
45	Men	High	SM Other (non-smoking-related)	0	30-54
45	Women	High	SM Other (non-smoking-related)	0	30-54
45	Men	Low	NS 01 Cancer	19.9463	30-54
45	Women	Low	NS 01 Cancer	15.3814	30-54
45	Men	Medium-low	NS 01 Cancer	67.3452	30-54
45	Women	Medium-low	NS 01 Cancer	44.7487	30-54
45	Men	Medium-high	NS 01 Cancer	36.3906	30-54
45	Women	Medium-high	NS 01 Cancer	32.3126	30-54
45	Men	High	NS 01 Cancer	38.8398	30-54
45	Women	High	NS 01 Cancer	43.0789	30-54
45	Men	Low	NS 02 Cancer, others	241.82	30-54
45	Women	Low	NS 02 Cancer, others	147.299	30-54
45	Men	Medium-low	NS 02 Cancer, others	625.815	30-54
45	Women	Medium-low	NS 02 Cancer, others	367.215	30-54
45	Men	Medium-high	NS 02 Cancer, others	353.777	30-54
45	Women	Medium-high	NS 02 Cancer, others	246.437	30-54
45	Men	High	NS 02 Cancer, others	382.642	30-54
45	Women	High	NS 02 Cancer, others	410.176	30-54
45	Men	Low	NS 03 IHD	72.3972	30-54
45	Women	Low	NS 03 IHD	22.9168	30-54
45	Men	Medium-low	NS 03 IHD	272.773	30-54
45	Women	Medium-low	NS 03 IHD	46.2899	30-54
45	Men	Medium-high	NS 03 IHD	154.518	30-54
45	Women	Medium-high	NS 03 IHD	25.0845	30-54
45	Men	High	NS 03 IHD	172.312	30-54
45	Women	High	NS 03 IHD	22.7227	30-54
45	Men	Low	NS 04 Other Heart	101.321	30-54
45	Women	Low	NS 04 Other Heart	56.3888	30-54
45	Men	Medium-low	NS 04 Other Heart	296.151	30-54
45	Women	Medium-low	NS 04 Other Heart	94.5129	30-54
45	Men	Medium-high	NS 04 Other Heart	152.535	30-54
45	Women	Medium-high	NS 04 Other Heart	62.2326	30-54
45	Men	High	NS 04 Other Heart	145.948	30-54
45	Women	High	NS 04 Other Heart	62.6782	30-54
45	Men	Low	NS 05 Cerebrovascular	55.8354	30-54
45	Women	Low	NS 05 Cerebrovascular	34.7521	30-54
45	Men	Medium-low	NS 05 Cerebrovascular	133.132	30-54
45	Women	Medium-low	NS 05 Cerebrovascular	82.1228	30-54
45	Men	Medium-high	NS 05 Cerebrovascular	74.4487	30-54
45	Women	Medium-high	NS 05 Cerebrovascular	38.0689	30-54
45	Men	High	NS 05 Cerebrovascular	78.4494	30-54
45	Women	High	NS 05 Cerebrovascular	71.7476	30-54
45	Men	Low	NS 06 Other Vascular	18.3275	30-54
45	Women	Low	NS 06 Other Vascular	3.57797	30-54
45	Men	Medium-low	NS 06 Other Vascular	37.9026	30-54
45	Women	Medium-low	NS 06 Other Vascular	10.5474	30-54
45	Men	Medium-high	NS 06 Other Vascular	18.3695	30-54
45	Women	Medium-high	NS 06 Other Vascular	7.62787	30-54
45	Men	High	NS 06 Other Vascular	36.6426	30-54
45	Women	High	NS 06 Other Vascular	8.39951	30-54
45	Men	Low	NS 07 Diabetes	16.7745	30-54
45	Women	Low	NS 07 Diabetes	5.67705	30-54
45	Men	Medium-low	NS 07 Diabetes	27.2919	30-54
45	Women	Medium-low	NS 07 Diabetes	10.4595	30-54
45	Men	Medium-high	NS 07 Diabetes	12.0708	30-54
45	Women	Medium-high	NS 07 Diabetes	5.50131	30-54
45	Men	High	NS 07 Diabetes	11.5932	30-54
45	Women	High	NS 07 Diabetes	1.73081	30-54
45	Men	Low	NS 08 IPT	23.0638	30-54
45	Women	Low	NS 08 IPT	9.84298	30-54
45	Men	Medium-low	NS 08 IPT	36.2605	30-54
45	Women	Medium-low	NS 08 IPT	11.9713	30-54
45	Men	Medium-high	NS 08 IPT	20.983	30-54
45	Women	Medium-high	NS 08 IPT	5.23689	30-54
45	Men	High	NS 08 IPT	14.9511	30-54
45	Women	High	NS 08 IPT	6.26321	30-54
45	Men	Low	NS 09 COPD	11.5736	30-54
45	Women	Low	NS 09 COPD	3.46319	30-54
45	Men	Medium-low	NS 09 COPD	21.8722	30-54
45	Women	Medium-low	NS 09 COPD	4.74765	30-54
45	Men	Medium-high	NS 09 COPD	6.95265	30-54
45	Women	Medium-high	NS 09 COPD	3.22121	30-54
45	Men	High	NS 09 COPD	5.6097	30-54
45	Women	High	NS 09 COPD	1.47478	30-54
45	Men	Low	NS Other (non-smoking-related)	1467.61	30-54
45	Women	Low	NS Other (non-smoking-related)	744.362	30-54
45	Men	Medium-low	NS Other (non-smoking-related)	3542.95	30-54
45	Women	Medium-low	NS Other (non-smoking-related)	1644.06	30-54
45	Men	Medium-high	NS Other (non-smoking-related)	1774.71	30-54
45	Women	Medium-high	NS Other (non-smoking-related)	1106.12	30-54
45	Men	High	NS Other (non-smoking-related)	1691.74	30-54
45	Women	High	NS Other (non-smoking-related)	1678.46	30-54
50	Men	Low	SM 01 Cancer	389.304	30-54
50	Women	Low	SM 01 Cancer	122.193	30-54
50	Men	Medium-low	SM 01 Cancer	1166.82	30-54
50	Women	Medium-low	SM 01 Cancer	461.139	30-54
50	Men	Medium-high	SM 01 Cancer	520.525	30-54
50	Women	Medium-high	SM 01 Cancer	272.895	30-54
50	Men	High	SM 01 Cancer	408.578	30-54
50	Women	High	SM 01 Cancer	304.071	30-54
50	Men	Low	SM 02 Cancer, others	211.82	30-54
50	Women	Low	SM 02 Cancer, others	34.4274	30-54
50	Men	Medium-low	SM 02 Cancer, others	639.493	30-54
50	Women	Medium-low	SM 02 Cancer, others	107.391	30-54
50	Men	Medium-high	SM 02 Cancer, others	271.037	30-54
50	Women	Medium-high	SM 02 Cancer, others	66.3319	30-54
50	Men	High	SM 02 Cancer, others	207.209	30-54
50	Women	High	SM 02 Cancer, others	69.7873	30-54
50	Men	Low	SM 03 IHD	265.168	30-54
50	Women	Low	SM 03 IHD	51.6383	30-54
50	Men	Medium-low	SM 03 IHD	719.764	30-54
50	Women	Medium-low	SM 03 IHD	112.469	30-54
50	Men	Medium-high	SM 03 IHD	365.5	30-54
50	Women	Medium-high	SM 03 IHD	73.3563	30-54
50	Men	High	SM 03 IHD	257.122	30-54
50	Women	High	SM 03 IHD	47.8923	30-54
50	Men	Low	SM 04 Other Heart	127.537	30-54
50	Women	Low	SM 04 Other Heart	37.9013	30-54
50	Men	Medium-low	SM 04 Other Heart	291.673	30-54
50	Women	Medium-low	SM 04 Other Heart	71.3663	30-54
50	Men	Medium-high	SM 04 Other Heart	132.079	30-54
50	Women	Medium-high	SM 04 Other Heart	41.826	30-54
50	Men	High	SM 04 Other Heart	81.3047	30-54
50	Women	High	SM 04 Other Heart	25.504	30-54
50	Men	Low	SM 05 Cerebrovascular	62.4562	30-54
50	Women	Low	SM 05 Cerebrovascular	22.3993	30-54
50	Men	Medium-low	SM 05 Cerebrovascular	157.781	30-54
50	Women	Medium-low	SM 05 Cerebrovascular	65.6487	30-54
50	Men	Medium-high	SM 05 Cerebrovascular	63.1329	30-54
50	Women	Medium-high	SM 05 Cerebrovascular	35.8896	30-54
50	Men	High	SM 05 Cerebrovascular	42.0815	30-54
50	Women	High	SM 05 Cerebrovascular	21.6384	30-54
50	Men	Low	SM 06 Other Vascular	19.6196	30-54
50	Women	Low	SM 06 Other Vascular	5.18848	30-54
50	Men	Medium-low	SM 06 Other Vascular	38.504	30-54
50	Women	Medium-low	SM 06 Other Vascular	11.0525	30-54
50	Men	Medium-high	SM 06 Other Vascular	21.5009	30-54
50	Women	Medium-high	SM 06 Other Vascular	4.9712	30-54
50	Men	High	SM 06 Other Vascular	15.2684	30-54
50	Women	High	SM 06 Other Vascular	1.91682	30-54
50	Men	Low	SM 07 Diabetes	22.1629	30-54
50	Women	Low	SM 07 Diabetes	8.72391	30-54
50	Men	Medium-low	SM 07 Diabetes	44.8375	30-54
50	Women	Medium-low	SM 07 Diabetes	12.1956	30-54
50	Men	Medium-high	SM 07 Diabetes	15.8931	30-54
50	Women	Medium-high	SM 07 Diabetes	3.76135	30-54
50	Men	High	SM 07 Diabetes	6.51407	30-54
50	Women	High	SM 07 Diabetes	2.90065	30-54
50	Men	Low	SM 08 IPT	74.7231	30-54
50	Women	Low	SM 08 IPT	34.2446	30-54
50	Men	Medium-low	SM 08 IPT	99.0727	30-54
50	Women	Medium-low	SM 08 IPT	39.9634	30-54
50	Men	Medium-high	SM 08 IPT	38.318	30-54
50	Women	Medium-high	SM 08 IPT	13.1973	30-54
50	Men	High	SM 08 IPT	27.1381	30-54
50	Women	High	SM 08 IPT	12.4264	30-54
50	Men	Low	SM 09 COPD	57.1943	30-54
50	Women	Low	SM 09 COPD	19.7614	30-54
50	Men	Medium-low	SM 09 COPD	100.414	30-54
50	Women	Medium-low	SM 09 COPD	36.5438	30-54
50	Men	Medium-high	SM 09 COPD	25.1662	30-54
50	Women	Medium-high	SM 09 COPD	11.3329	30-54
50	Men	High	SM 09 COPD	8.96634	30-54
50	Women	High	SM 09 COPD	5.22763	30-54
50	Men	Low	SM Other (non-smoking-related)	0	30-54
50	Women	Low	SM Other (non-smoking-related)	0	30-54
50	Men	Medium-low	SM Other (non-smoking-related)	0	30-54
50	Women	Medium-low	SM Other (non-smoking-related)	0	30-54
50	Men	Medium-high	SM Other (non-smoking-related)	0	30-54
50	Women	Medium-high	SM Other (non-smoking-related)	0	30-54
50	Men	High	SM Other (non-smoking-related)	0	30-54
50	Women	High	SM Other (non-smoking-related)	0	30-54
50	Men	Low	NS 01 Cancer	59.6703	30-54
50	Women	Low	NS 01 Cancer	33.9168	30-54
50	Men	Medium-low	NS 01 Cancer	173.97	30-54
50	Women	Medium-low	NS 01 Cancer	96.9773	30-54
50	Men	Medium-high	NS 01 Cancer	94.1289	30-54
50	Women	Medium-high	NS 01 Cancer	65.8523	30-54
50	Men	High	NS 01 Cancer	113.009	30-54
50	Women	High	NS 01 Cancer	98.9559	30-54
50	Men	Low	NS 02 Cancer, others	532.121	30-54
50	Women	Low	NS 02 Cancer, others	319.639	30-54
50	Men	Medium-low	NS 02 Cancer, others	1529.56	30-54
50	Women	Medium-low	NS 02 Cancer, others	715.023	30-54
50	Men	Medium-high	NS 02 Cancer, others	770.276	30-54
50	Women	Medium-high	NS 02 Cancer, others	474.461	30-54
50	Men	High	NS 02 Cancer, others	847.48	30-54
50	Women	High	NS 02 Cancer, others	567.94	30-54
50	Men	Low	NS 03 IHD	185.486	30-54
50	Women	Low	NS 03 IHD	41.1651	30-54
50	Men	Medium-low	NS 03 IHD	488.118	30-54
50	Women	Medium-low	NS 03 IHD	66.8109	30-54
50	Men	Medium-high	NS 03 IHD	299.647	30-54
50	Women	Medium-high	NS 03 IHD	48.9756	30-54
50	Men	High	NS 03 IHD	319.195	30-54
50	Women	High	NS 03 IHD	40.6928	30-54
50	Men	Low	NS 04 Other Heart	204.038	30-54
50	Women	Low	NS 04 Other Heart	95.3636	30-54
50	Men	Medium-low	NS 04 Other Heart	464.666	30-54
50	Women	Medium-low	NS 04 Other Heart	138.05	30-54
50	Men	Medium-high	NS 04 Other Heart	261.261	30-54
50	Women	Medium-high	NS 04 Other Heart	94.6118	30-54
50	Men	High	NS 04 Other Heart	265.441	30-54
50	Women	High	NS 04 Other Heart	82.3771	30-54
50	Men	Low	NS 05 Cerebrovascular	99.9193	30-54
50	Women	Low	NS 05 Cerebrovascular	56.359	30-54
50	Men	Medium-low	NS 05 Cerebrovascular	251.362	30-54
50	Women	Medium-low	NS 05 Cerebrovascular	126.99	30-54
50	Men	Medium-high	NS 05 Cerebrovascular	124.881	30-54
50	Women	Medium-high	NS 05 Cerebrovascular	81.1835	30-54
50	Men	High	NS 05 Cerebrovascular	137.386	30-54
50	Women	High	NS 05 Cerebrovascular	69.8915	30-54
50	Men	Low	NS 06 Other Vascular	31.3881	30-54
50	Women	Low	NS 06 Other Vascular	13.0548	30-54
50	Men	Medium-low	NS 06 Other Vascular	61.341	30-54
50	Women	Medium-low	NS 06 Other Vascular	21.3799	30-54
50	Men	Medium-high	NS 06 Other Vascular	42.5301	30-54
50	Women	Medium-high	NS 06 Other Vascular	11.245	30-54
50	Men	High	NS 06 Other Vascular	49.8478	30-54
50	Women	High	NS 06 Other Vascular	6.19129	30-54
50	Men	Low	NS 07 Diabetes	35.4569	30-54
50	Women	Low	NS 07 Diabetes	21.9502	30-54
50	Men	Medium-low	NS 07 Diabetes	71.4311	30-54
50	Women	Medium-low	NS 07 Diabetes	23.5909	30-54
50	Men	Medium-high	NS 07 Diabetes	31.4375	30-54
50	Women	Medium-high	NS 07 Diabetes	8.50831	30-54
50	Men	High	NS 07 Diabetes	21.2669	30-54
50	Women	High	NS 07 Diabetes	9.36902	30-54
50	Men	Low	NS 08 IPT	42.2515	30-54
50	Women	Low	NS 08 IPT	21.317	30-54
50	Men	Medium-low	NS 08 IPT	53.9782	30-54
50	Women	Medium-low	NS 08 IPT	18.8037	30-54
50	Men	Medium-high	NS 08 IPT	25.0887	30-54
50	Women	Medium-high	NS 08 IPT	7.10407	30-54
50	Men	High	NS 08 IPT	26.4297	30-54
50	Women	High	NS 08 IPT	8.94348	30-54
50	Men	Low	NS 09 COPD	32.34	30-54
50	Women	Low	NS 09 COPD	12.945	30-54
50	Men	Medium-low	NS 09 COPD	54.7091	30-54
50	Women	Medium-low	NS 09 COPD	18.3186	30-54
50	Men	Medium-high	NS 09 COPD	16.4776	30-54
50	Women	Medium-high	NS 09 COPD	6.60285	30-54
50	Men	High	NS 09 COPD	8.73229	30-54
50	Women	High	NS 09 COPD	4.26778	30-54
50	Men	Low	NS Other (non-smoking-related)	2275.61	30-54
50	Women	Low	NS Other (non-smoking-related)	1391.16	30-54
50	Men	Medium-low	NS Other (non-smoking-related)	4990.67	30-54
50	Women	Medium-low	NS Other (non-smoking-related)	2514.08	30-54
50	Men	Medium-high	NS Other (non-smoking-related)	2435.51	30-54
50	Women	Medium-high	NS Other (non-smoking-related)	1665.65	30-54
50	Men	High	NS Other (non-smoking-related)	2322.2	30-54
50	Women	High	NS Other (non-smoking-related)	2096.1	30-54
55	Men	Low	SM 01 Cancer	884.446	55-64
55	Women	Low	SM 01 Cancer	281.49	55-64
55	Men	Medium-low	SM 01 Cancer	2320.79	55-64
55	Women	Medium-low	SM 01 Cancer	786.914	55-64
55	Men	Medium-high	SM 01 Cancer	1017.48	55-64
55	Women	Medium-high	SM 01 Cancer	539.35	55-64
55	Men	High	SM 01 Cancer	868.176	55-64
55	Women	High	SM 01 Cancer	518.992	55-64
55	Men	Low	SM 02 Cancer, others	404.895	55-64
55	Women	Low	SM 02 Cancer, others	133.619	55-64
55	Men	Medium-low	SM 02 Cancer, others	1045.19	55-64
55	Women	Medium-low	SM 02 Cancer, others	309.684	55-64
55	Men	Medium-high	SM 02 Cancer, others	492.989	55-64
55	Women	Medium-high	SM 02 Cancer, others	216.592	55-64
55	Men	High	SM 02 Cancer, others	434.621	55-64
55	Women	High	SM 02 Cancer, others	203.52	55-64
55	Men	Low	SM 03 IHD	353.177	55-64
55	Women	Low	SM 03 IHD	51.7017	55-64
55	Men	Medium-low	SM 03 IHD	737.658	55-64
55	Women	Medium-low	SM 03 IHD	102.183	55-64
55	Men	Medium-high	SM 03 IHD	398.036	55-64
55	Women	Medium-high	SM 03 IHD	51.5723	55-64
55	Men	High	SM 03 IHD	350.149	55-64
55	Women	High	SM 03 IHD	48.1197	55-64
55	Men	Low	SM 04 Other Heart	184.902	55-64
55	Women	Low	SM 04 Other Heart	35.5669	55-64
55	Men	Medium-low	SM 04 Other Heart	374.447	55-64
55	Women	Medium-low	SM 04 Other Heart	62.0448	55-64
55	Men	Medium-high	SM 04 Other Heart	185.411	55-64
55	Women	Medium-high	SM 04 Other Heart	34.4058	55-64
55	Men	High	SM 04 Other Heart	157.708	55-64
55	Women	High	SM 04 Other Heart	28.3581	55-64
55	Men	Low	SM 05 Cerebrovascular	107.905	55-64
55	Women	Low	SM 05 Cerebrovascular	29.2071	55-64
55	Men	Medium-low	SM 05 Cerebrovascular	230.314	55-64
55	Women	Medium-low	SM 05 Cerebrovascular	51.6425	55-64
55	Men	Medium-high	SM 05 Cerebrovascular	113.722	55-64
55	Women	Medium-high	SM 05 Cerebrovascular	30.2678	55-64
55	Men	High	SM 05 Cerebrovascular	90.8254	55-64
55	Women	High	SM 05 Cerebrovascular	29.3584	55-64
55	Men	Low	SM 06 Other Vascular	30.1241	55-64
55	Women	Low	SM 06 Other Vascular	3.65097	55-64
55	Men	Medium-low	SM 06 Other Vascular	70.5025	55-64
55	Women	Medium-low	SM 06 Other Vascular	9.27448	55-64
55	Men	Medium-high	SM 06 Other Vascular	42.6801	55-64
55	Women	Medium-high	SM 06 Other Vascular	6.4716	55-64
55	Men	High	SM 06 Other Vascular	28.7586	55-64
55	Women	High	SM 06 Other Vascular	3.23275	55-64
55	Men	Low	SM 07 Diabetes	42.0179	55-64
55	Women	Low	SM 07 Diabetes	8.396	55-64
55	Men	Medium-low	SM 07 Diabetes	83.9534	55-64
55	Women	Medium-low	SM 07 Diabetes	12.2318	55-64
55	Men	Medium-high	SM 07 Diabetes	27.5693	55-64
55	Women	Medium-high	SM 07 Diabetes	4.66403	55-64
55	Men	High	SM 07 Diabetes	23.4625	55-64
55	Women	High	SM 07 Diabetes	3.77431	55-64
55	Men	Low	SM 08 IPT	127.822	55-64
55	Women	Low	SM 08 IPT	45.8038	55-64
55	Men	Medium-low	SM 08 IPT	176.648	55-64
55	Women	Medium-low	SM 08 IPT	52.044	55-64
55	Men	Medium-high	SM 08 IPT	77.1338	55-64
55	Women	Medium-high	SM 08 IPT	34.0724	55-64
55	Men	High	SM 08 IPT	58.6575	55-64
55	Women	High	SM 08 IPT	22.0351	55-64
55	Men	Low	SM 09 COPD	135.859	55-64
55	Women	Low	SM 09 COPD	39.3462	55-64
55	Men	Medium-low	SM 09 COPD	247.213	55-64
55	Women	Medium-low	SM 09 COPD	57.6451	55-64
55	Men	Medium-high	SM 09 COPD	86.237	55-64
55	Women	Medium-high	SM 09 COPD	22.3742	55-64
55	Men	High	SM 09 COPD	54.973	55-64
55	Women	High	SM 09 COPD	21.91	55-64
55	Men	Low	SM Other (non-smoking-related)	0	55-64
55	Women	Low	SM Other (non-smoking-related)	0	55-64
55	Men	Medium-low	SM Other (non-smoking-related)	0	55-64
55	Women	Medium-low	SM Other (non-smoking-related)	0	55-64
55	Men	Medium-high	SM Other (non-smoking-related)	0	55-64
55	Women	Medium-high	SM Other (non-smoking-related)	0	55-64
55	Men	High	SM Other (non-smoking-related)	0	55-64
55	Women	High	SM Other (non-smoking-related)	0	55-64
55	Men	Low	NS 01 Cancer	134.218	55-64
55	Women	Low	NS 01 Cancer	73.8589	55-64
55	Men	Medium-low	NS 01 Cancer	330.191	55-64
55	Women	Medium-low	NS 01 Cancer	157.593	55-64
55	Men	Medium-high	NS 01 Cancer	144.371	55-64
55	Women	Medium-high	NS 01 Cancer	88.9471	55-64
55	Men	High	NS 01 Cancer	143.329	55-64
55	Women	High	NS 01 Cancer	93.8552	55-64
55	Men	Low	NS 02 Cancer, others	1086.93	55-64
55	Women	Low	NS 02 Cancer, others	565.165	55-64
55	Men	Medium-low	NS 02 Cancer, others	2612.65	55-64
55	Women	Medium-low	NS 02 Cancer, others	997.851	55-64
55	Men	Medium-high	NS 02 Cancer, others	1244.74	55-64
55	Women	Medium-high	NS 02 Cancer, others	574.272	55-64
55	Men	High	NS 02 Cancer, others	1255.98	55-64
55	Women	High	NS 02 Cancer, others	585.298	55-64
55	Men	Low	NS 03 IHD	452.92	55-64
55	Women	Low	NS 03 IHD	121.651	55-64
55	Men	Medium-low	NS 03 IHD	884.287	55-64
55	Women	Medium-low	NS 03 IHD	184.966	55-64
55	Men	Medium-high	NS 03 IHD	478.487	55-64
55	Women	Medium-high	NS 03 IHD	77.113	55-64
55	Men	High	NS 03 IHD	486.285	55-64
55	Women	High	NS 03 IHD	82.6927	55-64
55	Men	Low	NS 04 Other Heart	289.012	55-64
55	Women	Low	NS 04 Other Heart	190.549	55-64
55	Men	Medium-low	NS 04 Other Heart	545.439	55-64
55	Women	Medium-low	NS 04 Other Heart	255.569	55-64
55	Men	Medium-high	NS 04 Other Heart	272.383	55-64
55	Women	Medium-high	NS 04 Other Heart	117.039	55-64
55	Men	High	NS 04 Other Heart	265.698	55-64
55	Women	High	NS 04 Other Heart	110.467	55-64
55	Men	Low	NS 05 Cerebrovascular	168.662	55-64
55	Women	Low	NS 05 Cerebrovascular	156.477	55-64
55	Men	Medium-low	NS 05 Cerebrovascular	335.487	55-64
55	Women	Medium-low	NS 05 Cerebrovascular	212.721	55-64
55	Men	Medium-high	NS 05 Cerebrovascular	167.067	55-64
55	Women	Medium-high	NS 05 Cerebrovascular	102.963	55-64
55	Men	High	NS 05 Cerebrovascular	153.018	55-64
55	Women	High	NS 05 Cerebrovascular	114.363	55-64
55	Men	Low	NS 06 Other Vascular	47.0855	55-64
55	Women	Low	NS 06 Other Vascular	19.56	55-64
55	Men	Medium-low	NS 06 Other Vascular	102.698	55-64
55	Women	Medium-low	NS 06 Other Vascular	38.2026	55-64
55	Men	Medium-high	NS 06 Other Vascular	62.7006	55-64
55	Women	Medium-high	NS 06 Other Vascular	22.0146	55-64
55	Men	High	NS 06 Other Vascular	48.451	55-64
55	Women	High	NS 06 Other Vascular	12.5929	55-64
55	Men	Low	NS 07 Diabetes	65.6762	55-64
55	Women	Low	NS 07 Diabetes	44.9815	55-64
55	Men	Medium-low	NS 07 Diabetes	122.291	55-64
55	Women	Medium-low	NS 07 Diabetes	50.3841	55-64
55	Men	Medium-high	NS 07 Diabetes	40.5015	55-64
55	Women	Medium-high	NS 07 Diabetes	15.8658	55-64
55	Men	High	NS 07 Diabetes	39.5284	55-64
55	Women	High	NS 07 Diabetes	14.7025	55-64
55	Men	Low	NS 08 IPT	24.3403	55-64
55	Women	Low	NS 08 IPT	22.1185	55-64
55	Men	Medium-low	NS 08 IPT	31.5178	55-64
55	Women	Medium-low	NS 08 IPT	18.9657	55-64
55	Men	Medium-high	NS 08 IPT	13.7407	55-64
55	Women	Medium-high	NS 08 IPT	10.18	55-64
55	Men	High	NS 08 IPT	12.1401	55-64
55	Women	High	NS 08 IPT	6.78046	55-64
55	Men	Low	NS 09 COPD	25.8707	55-64
55	Women	Low	NS 09 COPD	27.3708	55-64
55	Men	Medium-low	NS 09 COPD	44.108	55-64
55	Women	Medium-low	NS 09 COPD	30.9634	55-64
55	Men	Medium-high	NS 09 COPD	15.3623	55-64
55	Women	Medium-high	NS 09 COPD	9.94182	55-64
55	Men	High	NS 09 COPD	11.3776	55-64
55	Women	High	NS 09 COPD	11.4485	55-64
55	Men	Low	NS Other (non-smoking-related)	3303.02	55-64
55	Women	Low	NS Other (non-smoking-related)	2234.85	55-64
55	Men	Medium-low	NS Other (non-smoking-related)	5800.52	55-64
55	Women	Medium-low	NS Other (non-smoking-related)	3247.09	55-64
55	Men	Medium-high	NS Other (non-smoking-related)	2910.78	55-64
55	Women	Medium-high	NS Other (non-smoking-related)	2020.32	55-64
55	Men	High	NS Other (non-smoking-related)	2684.69	55-64
55	Women	High	NS Other (non-smoking-related)	2206.73	55-64
60	Men	Low	SM 01 Cancer	1777.43	55-64
60	Women	Low	SM 01 Cancer	446.799	55-64
60	Men	Medium-low	SM 01 Cancer	3071.03	55-64
60	Women	Medium-low	SM 01 Cancer	811.064	55-64
60	Men	Medium-high	SM 01 Cancer	1462.67	55-64
60	Women	Medium-high	SM 01 Cancer	562.391	55-64
60	Men	High	SM 01 Cancer	1248.54	55-64
60	Women	High	SM 01 Cancer	635.426	55-64
60	Men	Low	SM 02 Cancer, others	698.772	55-64
60	Women	Low	SM 02 Cancer, others	215.753	55-64
60	Men	Medium-low	SM 02 Cancer, others	1291.94	55-64
60	Women	Medium-low	SM 02 Cancer, others	393.606	55-64
60	Men	Medium-high	SM 02 Cancer, others	632.518	55-64
60	Women	Medium-high	SM 02 Cancer, others	227.985	55-64
60	Men	High	SM 02 Cancer, others	571.864	55-64
60	Women	High	SM 02 Cancer, others	226.363	55-64
60	Men	Low	SM 03 IHD	586.222	55-64
60	Women	Low	SM 03 IHD	122.433	55-64
60	Men	Medium-low	SM 03 IHD	880.624	55-64
60	Women	Medium-low	SM 03 IHD	141.032	55-64
60	Men	Medium-high	SM 03 IHD	462.861	55-64
60	Women	Medium-high	SM 03 IHD	72.1954	55-64
60	Men	High	SM 03 IHD	391.171	55-64
60	Women	High	SM 03 IHD	52.6119	55-64
60	Men	Low	SM 04 Other Heart	295.572	55-64
60	Women	Low	SM 04 Other Heart	66.9153	55-64
60	Men	Medium-low	SM 04 Other Heart	434.607	55-64
60	Women	Medium-low	SM 04 Other Heart	89.5435	55-64
60	Men	Medium-high	SM 04 Other Heart	201.216	55-64
60	Women	Medium-high	SM 04 Other Heart	42.7662	55-64
60	Men	High	SM 04 Other Heart	196.643	55-64
60	Women	High	SM 04 Other Heart	30.6323	55-64
60	Men	Low	SM 05 Cerebrovascular	199.307	55-64
60	Women	Low	SM 05 Cerebrovascular	43.0975	55-64
60	Men	Medium-low	SM 05 Cerebrovascular	285.441	55-64
60	Women	Medium-low	SM 05 Cerebrovascular	71.2256	55-64
60	Men	Medium-high	SM 05 Cerebrovascular	121.355	55-64
60	Women	Medium-high	SM 05 Cerebrovascular	30.0333	55-64
60	Men	High	SM 05 Cerebrovascular	98.818	55-64
60	Women	High	SM 05 Cerebrovascular	27.0045	55-64
60	Men	Low	SM 06 Other Vascular	66.8558	55-64
60	Women	Low	SM 06 Other Vascular	8.16464	55-64
60	Men	Medium-low	SM 06 Other Vascular	113.238	55-64
60	Women	Medium-low	SM 06 Other Vascular	12.9444	55-64
60	Men	Medium-high	SM 06 Other Vascular	65.1163	55-64
60	Women	Medium-high	SM 06 Other Vascular	10.036	55-64
60	Men	High	SM 06 Other Vascular	52.3998	55-64
60	Women	High	SM 06 Other Vascular	7.89592	55-64
60	Men	Low	SM 07 Diabetes	86.4999	55-64
60	Women	Low	SM 07 Diabetes	22.3082	55-64
60	Men	Medium-low	SM 07 Diabetes	119.774	55-64
60	Women	Medium-low	SM 07 Diabetes	18.6047	55-64
60	Men	Medium-high	SM 07 Diabetes	46.3443	55-64
60	Women	Medium-high	SM 07 Diabetes	6.11475	55-64
60	Men	High	SM 07 Diabetes	28.5411	55-64
60	Women	High	SM 07 Diabetes	6.13249	55-64
60	Men	Low	SM 08 IPT	175.553	55-64
60	Women	Low	SM 08 IPT	71.3868	55-64
60	Men	Medium-low	SM 08 IPT	205.858	55-64
60	Women	Medium-low	SM 08 IPT	64.3962	55-64
60	Men	Medium-high	SM 08 IPT	102.508	55-64
60	Women	Medium-high	SM 08 IPT	28.5275	55-64
60	Men	High	SM 08 IPT	63.5161	55-64
60	Women	High	SM 08 IPT	30.761	55-64
60	Men	Low	SM 09 COPD	367.251	55-64
60	Women	Low	SM 09 COPD	89.4312	55-64
60	Men	Medium-low	SM 09 COPD	427.731	55-64
60	Women	Medium-low	SM 09 COPD	121.946	55-64
60	Men	Medium-high	SM 09 COPD	129.223	55-64
60	Women	Medium-high	SM 09 COPD	61.974	55-64
60	Men	High	SM 09 COPD	104.83	55-64
60	Women	High	SM 09 COPD	44.2666	55-64
60	Men	Low	SM Other (non-smoking-related)	0	55-64
60	Women	Low	SM Other (non-smoking-related)	0	55-64
60	Men	Medium-low	SM Other (non-smoking-related)	0	55-64
60	Women	Medium-low	SM Other (non-smoking-related)	0	55-64
60	Men	Medium-high	SM Other (non-smoking-related)	0	55-64
60	Women	Medium-high	SM Other (non-smoking-related)	0	55-64
60	Men	High	SM Other (non-smoking-related)	0	55-64
60	Women	High	SM Other (non-smoking-related)	0	55-64
60	Men	Low	NS 01 Cancer	269.732	55-64
60	Women	Low	NS 01 Cancer	117.234	55-64
60	Men	Medium-low	NS 01 Cancer	436.931	55-64
60	Women	Medium-low	NS 01 Cancer	162.429	55-64
60	Men	Medium-high	NS 01 Cancer	207.541	55-64
60	Women	Medium-high	NS 01 Cancer	92.7468	55-64
60	Men	High	NS 01 Cancer	206.125	55-64
60	Women	High	NS 01 Cancer	114.911	55-64
60	Men	Low	NS 02 Cancer, others	1875.83	55-64
60	Women	Low	NS 02 Cancer, others	912.563	55-64
60	Men	Medium-low	NS 02 Cancer, others	3229.44	55-64
60	Women	Medium-low	NS 02 Cancer, others	1268.26	55-64
60	Men	Medium-high	NS 02 Cancer, others	1597.04	55-64
60	Women	Medium-high	NS 02 Cancer, others	604.48	55-64
60	Men	High	NS 02 Cancer, others	1652.59	55-64
60	Women	High	NS 02 Cancer, others	650.99	55-64
60	Men	Low	NS 03 IHD	751.78	55-64
60	Women	Low	NS 03 IHD	288.079	55-64
60	Men	Medium-low	NS 03 IHD	1055.67	55-64
60	Women	Medium-low	NS 03 IHD	255.287	55-64
60	Men	Medium-high	NS 03 IHD	556.414	55-64
60	Women	Medium-high	NS 03 IHD	107.949	55-64
60	Men	High	NS 03 IHD	543.255	55-64
60	Women	High	NS 03 IHD	90.4123	55-64
60	Men	Low	NS 04 Other Heart	461.995	55-64
60	Women	Low	NS 04 Other Heart	358.498	55-64
60	Men	Medium-low	NS 04 Other Heart	633.07	55-64
60	Women	Medium-low	NS 04 Other Heart	368.839	55-64
60	Men	Medium-high	NS 04 Other Heart	295.603	55-64
60	Women	Medium-high	NS 04 Other Heart	145.479	55-64
60	Men	High	NS 04 Other Heart	331.294	55-64
60	Women	High	NS 04 Other Heart	119.326	55-64
60	Men	Low	NS 05 Cerebrovascular	311.528	55-64
60	Women	Low	NS 05 Cerebrovascular	230.894	55-64
60	Men	Medium-low	NS 05 Cerebrovascular	415.788	55-64
60	Women	Medium-low	NS 05 Cerebrovascular	293.386	55-64
60	Men	Medium-high	NS 05 Cerebrovascular	178.28	55-64
60	Women	Medium-high	NS 05 Cerebrovascular	102.165	55-64
60	Men	High	NS 05 Cerebrovascular	166.483	55-64
60	Women	High	NS 05 Cerebrovascular	105.194	55-64
60	Men	Low	NS 06 Other Vascular	104.499	55-64
60	Women	Low	NS 06 Other Vascular	43.742	55-64
60	Men	Medium-low	NS 06 Other Vascular	164.949	55-64
60	Women	Medium-low	NS 06 Other Vascular	53.3193	55-64
60	Men	Medium-high	NS 06 Other Vascular	95.6612	55-64
60	Women	Medium-high	NS 06 Other Vascular	34.1398	55-64
60	Men	High	NS 06 Other Vascular	88.2805	55-64
60	Women	High	NS 06 Other Vascular	30.7579	55-64
60	Men	Low	NS 07 Diabetes	135.204	55-64
60	Women	Low	NS 07 Diabetes	119.516	55-64
60	Men	Medium-low	NS 07 Diabetes	174.469	55-64
60	Women	Medium-low	NS 07 Diabetes	76.6347	55-64
60	Men	Medium-high	NS 07 Diabetes	68.0835	55-64
60	Women	Medium-high	NS 07 Diabetes	20.8007	55-64
60	Men	High	NS 07 Diabetes	48.0846	55-64
60	Women	High	NS 07 Diabetes	23.8886	55-64
60	Men	Low	NS 08 IPT	33.4294	55-64
60	Women	Low	NS 08 IPT	34.4725	55-64
60	Men	Medium-low	NS 08 IPT	36.7294	55-64
60	Women	Medium-low	NS 08 IPT	23.4671	55-64
60	Men	Medium-high	NS 08 IPT	18.2608	55-64
60	Women	Medium-high	NS 08 IPT	8.5233	55-64
60	Men	High	NS 08 IPT	13.1457	55-64
60	Women	High	NS 08 IPT	9.46554	55-64
60	Men	Low	NS 09 COPD	69.9332	55-64
60	Women	Low	NS 09 COPD	62.2121	55-64
60	Men	Medium-low	NS 09 COPD	76.3163	55-64
60	Women	Medium-low	NS 09 COPD	65.5019	55-64
60	Men	Medium-high	NS 09 COPD	23.0198	55-64
60	Women	Medium-high	NS 09 COPD	27.5377	55-64
60	Men	High	NS 09 COPD	21.6962	55-64
60	Women	High	NS 09 COPD	23.1304	55-64
60	Men	Low	NS Other (non-smoking-related)	4709.39	55-64
60	Women	Low	NS Other (non-smoking-related)	3753.98	55-64
60	Men	Medium-low	NS Other (non-smoking-related)	6521.18	55-64
60	Women	Medium-low	NS Other (non-smoking-related)	3918.32	55-64
60	Men	Medium-high	NS Other (non-smoking-related)	3140.99	55-64
60	Women	Medium-high	NS Other (non-smoking-related)	1924.53	55-64
60	Men	High	NS Other (non-smoking-related)	3214.43	55-64
60	Women	High	NS Other (non-smoking-related)	2067.17	55-64
65	Men	Low	SM 01 Cancer	3201.81	65-75
65	Women	Low	SM 01 Cancer	453.448	65-75
65	Men	Medium-low	SM 01 Cancer	3505.81	65-75
65	Women	Medium-low	SM 01 Cancer	574.658	65-75
65	Men	Medium-high	SM 01 Cancer	1438.54	65-75
65	Women	Medium-high	SM 01 Cancer	427.945	65-75
65	Men	High	SM 01 Cancer	1667.84	65-75
65	Women	High	SM 01 Cancer	461.07	65-75
65	Men	Low	SM 02 Cancer, others	1518.84	65-75
65	Women	Low	SM 02 Cancer, others	173.676	65-75
65	Men	Medium-low	SM 02 Cancer, others	1679.98	65-75
65	Women	Medium-low	SM 02 Cancer, others	207.211	65-75
65	Men	Medium-high	SM 02 Cancer, others	711.195	65-75
65	Women	Medium-high	SM 02 Cancer, others	134.517	65-75
65	Men	High	SM 02 Cancer, others	793.234	65-75
65	Women	High	SM 02 Cancer, others	145.049	65-75
65	Men	Low	SM 03 IHD	838.315	65-75
65	Women	Low	SM 03 IHD	116.796	65-75
65	Men	Medium-low	SM 03 IHD	827.457	65-75
65	Women	Medium-low	SM 03 IHD	98.0819	65-75
65	Men	Medium-high	SM 03 IHD	375.259	65-75
65	Women	Medium-high	SM 03 IHD	65.519	65-75
65	Men	High	SM 03 IHD	414.263	65-75
65	Women	High	SM 03 IHD	57.2966	65-75
65	Men	Low	SM 04 Other Heart	384.682	65-75
65	Women	Low	SM 04 Other Heart	69.3293	65-75
65	Men	Medium-low	SM 04 Other Heart	369.95	65-75
65	Women	Medium-low	SM 04 Other Heart	54.7834	65-75
65	Men	Medium-high	SM 04 Other Heart	162.922	65-75
65	Women	Medium-high	SM 04 Other Heart	41.3341	65-75
65	Men	High	SM 04 Other Heart	168.468	65-75
65	Women	High	SM 04 Other Heart	34.1068	65-75
65	Men	Low	SM 05 Cerebrovascular	238.489	65-75
65	Women	Low	SM 05 Cerebrovascular	54.6896	65-75
65	Men	Medium-low	SM 05 Cerebrovascular	225.67	65-75
65	Women	Medium-low	SM 05 Cerebrovascular	47.8968	65-75
65	Men	Medium-high	SM 05 Cerebrovascular	86.666	65-75
65	Women	Medium-high	SM 05 Cerebrovascular	31.2024	65-75
65	Men	High	SM 05 Cerebrovascular	91.811	65-75
65	Women	High	SM 05 Cerebrovascular	34.7059	65-75
65	Men	Low	SM 06 Other Vascular	211.294	65-75
65	Women	Low	SM 06 Other Vascular	32.539	65-75
65	Men	Medium-low	SM 06 Other Vascular	225.762	65-75
65	Women	Medium-low	SM 06 Other Vascular	42.5209	65-75
65	Men	Medium-high	SM 06 Other Vascular	108.259	65-75
65	Women	Medium-high	SM 06 Other Vascular	20.2367	65-75
65	Men	High	SM 06 Other Vascular	120.329	65-75
65	Women	High	SM 06 Other Vascular	20.17	65-75
65	Men	Low	SM 07 Diabetes	116.151	65-75
65	Women	Low	SM 07 Diabetes	17.1344	65-75
65	Men	Medium-low	SM 07 Diabetes	111.711	65-75
65	Women	Medium-low	SM 07 Diabetes	9.77195	65-75
65	Men	Medium-high	SM 07 Diabetes	42.3396	65-75
65	Women	Medium-high	SM 07 Diabetes	3.86426	65-75
65	Men	High	SM 07 Diabetes	35.267	65-75
65	Women	High	SM 07 Diabetes	3.73454	65-75
65	Men	Low	SM 08 IPT	131.722	65-75
65	Women	Low	SM 08 IPT	13.3572	65-75
65	Men	Medium-low	SM 08 IPT	116.421	65-75
65	Women	Medium-low	SM 08 IPT	11.3433	65-75
65	Men	Medium-high	SM 08 IPT	43.1119	65-75
65	Women	Medium-high	SM 08 IPT	7.17794	65-75
65	Men	High	SM 08 IPT	43.9861	65-75
65	Women	High	SM 08 IPT	7.48478	65-75
65	Men	Low	SM 09 COPD	915.669	65-75
65	Women	Low	SM 09 COPD	204.688	65-75
65	Men	Medium-low	SM 09 COPD	760.263	65-75
65	Women	Medium-low	SM 09 COPD	161.078	65-75
65	Men	Medium-high	SM 09 COPD	244.315	65-75
65	Women	Medium-high	SM 09 COPD	100.735	65-75
65	Men	High	SM 09 COPD	234.851	65-75
65	Women	High	SM 09 COPD	76.3502	65-75
65	Men	Low	SM Other (non-smoking-related)	0	65-75
65	Women	Low	SM Other (non-smoking-related)	0	65-75
65	Men	Medium-low	SM Other (non-smoking-related)	0	65-75
65	Women	Medium-low	SM Other (non-smoking-related)	0	65-75
65	Men	Medium-high	SM Other (non-smoking-related)	0	65-75
65	Women	Medium-high	SM Other (non-smoking-related)	0	65-75
65	Men	High	SM Other (non-smoking-related)	0	65-75
65	Women	High	SM Other (non-smoking-related)	0	65-75
65	Men	Low	NS 01 Cancer	380.155	65-75
65	Women	Low	NS 01 Cancer	251.414	65-75
65	Men	Medium-low	NS 01 Cancer	412.975	65-75
65	Women	Medium-low	NS 01 Cancer	231.786	65-75
65	Men	Medium-high	NS 01 Cancer	170.292	65-75
65	Women	Medium-high	NS 01 Cancer	89.2989	65-75
65	Men	High	NS 01 Cancer	206.584	65-75
65	Women	High	NS 01 Cancer	90.3806	65-75
65	Men	Low	NS 02 Cancer, others	3037.51	65-75
65	Women	Low	NS 02 Cancer, others	2091.51	65-75
65	Men	Medium-low	NS 02 Cancer, others	3369.03	65-75
65	Women	Medium-low	NS 02 Cancer, others	1816.26	65-75
65	Men	Medium-high	NS 02 Cancer, others	1427.75	65-75
65	Women	Medium-high	NS 02 Cancer, others	607.967	65-75
65	Men	High	NS 02 Cancer, others	1638.45	65-75
65	Women	High	NS 02 Cancer, others	616.812	65-75
65	Men	Low	NS 03 IHD	1351.98	65-75
65	Women	Low	NS 03 IHD	651.795	65-75
65	Men	Medium-low	NS 03 IHD	1334.48	65-75
65	Women	Medium-low	NS 03 IHD	398.413	65-75
65	Men	Medium-high	NS 03 IHD	606.448	65-75
65	Women	Medium-high	NS 03 IHD	137.198	65-75
65	Men	High	NS 03 IHD	691.794	65-75
65	Women	High	NS 03 IHD	112.899	65-75
65	Men	Low	NS 04 Other Heart	998.076	65-75
65	Women	Low	NS 04 Other Heart	908.2	65-75
65	Men	Medium-low	NS 04 Other Heart	953.698	65-75
65	Women	Medium-low	NS 04 Other Heart	520.172	65-75
65	Men	Medium-high	NS 04 Other Heart	421.848	65-75
65	Women	Medium-high	NS 04 Other Heart	207.778	65-75
65	Men	High	NS 04 Other Heart	455.356	65-75
65	Women	High	NS 04 Other Heart	159.297	65-75
65	Men	Low	NS 05 Cerebrovascular	727.039	65-75
65	Women	Low	NS 05 Cerebrovascular	601.404	65-75
65	Men	Medium-low	NS 05 Cerebrovascular	678.206	65-75
65	Women	Medium-low	NS 05 Cerebrovascular	384.553	65-75
65	Men	Medium-high	NS 05 Cerebrovascular	262.345	65-75
65	Women	Medium-high	NS 05 Cerebrovascular	126.726	65-75
65	Men	High	NS 05 Cerebrovascular	293.773	65-75
65	Women	High	NS 05 Cerebrovascular	133.822	65-75
65	Men	Low	NS 06 Other Vascular	121.658	65-75
65	Women	Low	NS 06 Other Vascular	74.7337	65-75
65	Men	Medium-low	NS 06 Other Vascular	128.065	65-75
65	Women	Medium-low	NS 06 Other Vascular	71.1882	65-75
65	Men	Medium-high	NS 06 Other Vascular	61.8699	65-75
65	Women	Medium-high	NS 06 Other Vascular	17.3087	65-75
65	Men	High	NS 06 Other Vascular	72.7627	65-75
65	Women	High	NS 06 Other Vascular	16.3027	65-75
65	Men	Low	NS 07 Diabetes	310.756	65-75
65	Women	Low	NS 07 Diabetes	280.216	65-75
65	Men	Medium-low	NS 07 Diabetes	308.013	65-75
65	Women	Medium-low	NS 07 Diabetes	115.157	65-75
65	Men	Medium-high	NS 07 Diabetes	115.698	65-75
65	Women	Medium-high	NS 07 Diabetes	25.0448	65-75
65	Men	High	NS 07 Diabetes	95.0631	65-75
65	Women	High	NS 07 Diabetes	22.0771	65-75
65	Men	Low	NS 08 IPT	215.801	65-75
65	Women	Low	NS 08 IPT	190.163	65-75
65	Men	Medium-low	NS 08 IPT	191.682	65-75
65	Women	Medium-low	NS 08 IPT	116.917	65-75
65	Men	Medium-high	NS 08 IPT	71.0003	65-75
65	Women	Medium-high	NS 08 IPT	39.4621	65-75
65	Men	High	NS 08 IPT	74.2755	65-75
65	Women	High	NS 08 IPT	38.0952	65-75
65	Men	Low	NS 09 COPD	103.466	65-75
65	Women	Low	NS 09 COPD	56.5863	65-75
65	Men	Medium-low	NS 09 COPD	85.2273	65-75
65	Women	Medium-low	NS 09 COPD	32.2223	65-75
65	Men	Medium-high	NS 09 COPD	27.5238	65-75
65	Women	Medium-high	NS 09 COPD	10.7843	65-75
65	Men	High	NS 09 COPD	27.6849	65-75
65	Women	High	NS 09 COPD	7.55501	65-75
65	Men	Low	NS Other (non-smoking-related)	7977.24	65-75
65	Women	Low	NS Other (non-smoking-related)	6735.34	65-75
65	Men	Medium-low	NS Other (non-smoking-related)	7738.34	65-75
65	Women	Medium-low	NS Other (non-smoking-related)	4773.96	65-75
65	Men	Medium-high	NS Other (non-smoking-related)	3223.1	65-75
65	Women	Medium-high	NS Other (non-smoking-related)	1913.92	65-75
65	Men	High	NS Other (non-smoking-related)	3846.32	65-75
65	Women	High	NS Other (non-smoking-related)	1909.79	65-75
70	Men	Low	SM 01 Cancer	4478.92	65-75
70	Women	Low	SM 01 Cancer	596.928	65-75
70	Men	Medium-low	SM 01 Cancer	3314.85	65-75
70	Women	Medium-low	SM 01 Cancer	444.449	65-75
70	Men	Medium-high	SM 01 Cancer	1355.7	65-75
70	Women	Medium-high	SM 01 Cancer	305.893	65-75
70	Men	High	SM 01 Cancer	1522.23	65-75
70	Women	High	SM 01 Cancer	342.523	65-75
70	Men	Low	SM 02 Cancer, others	2333.38	65-75
70	Women	Low	SM 02 Cancer, others	301.133	65-75
70	Men	Medium-low	SM 02 Cancer, others	1740.58	65-75
70	Women	Medium-low	SM 02 Cancer, others	199.325	65-75
70	Men	Medium-high	SM 02 Cancer, others	702.893	65-75
70	Women	Medium-high	SM 02 Cancer, others	135.192	65-75
70	Men	High	SM 02 Cancer, others	884.02	65-75
70	Women	High	SM 02 Cancer, others	137.418	65-75
70	Men	Low	SM 03 IHD	1331.45	65-75
70	Women	Low	SM 03 IHD	254.741	65-75
70	Men	Medium-low	SM 03 IHD	843.78	65-75
70	Women	Medium-low	SM 03 IHD	123.763	65-75
70	Men	Medium-high	SM 03 IHD	372.853	65-75
70	Women	Medium-high	SM 03 IHD	68.4165	65-75
70	Men	High	SM 03 IHD	443.932	65-75
70	Women	High	SM 03 IHD	59.7457	65-75
70	Men	Low	SM 04 Other Heart	680.49	65-75
70	Women	Low	SM 04 Other Heart	153.32	65-75
70	Men	Medium-low	SM 04 Other Heart	423.772	65-75
70	Women	Medium-low	SM 04 Other Heart	74.8933	65-75
70	Men	Medium-high	SM 04 Other Heart	175.041	65-75
70	Women	Medium-high	SM 04 Other Heart	48.5001	65-75
70	Men	High	SM 04 Other Heart	218.872	65-75
70	Women	High	SM 04 Other Heart	49.3616	65-75
70	Men	Low	SM 05 Cerebrovascular	465.254	65-75
70	Women	Low	SM 05 Cerebrovascular	129.197	65-75
70	Men	Medium-low	SM 05 Cerebrovascular	298.04	65-75
70	Women	Medium-low	SM 05 Cerebrovascular	70.2895	65-75
70	Men	Medium-high	SM 05 Cerebrovascular	111.193	65-75
70	Women	Medium-high	SM 05 Cerebrovascular	44.4454	65-75
70	Men	High	SM 05 Cerebrovascular	139.028	65-75
70	Women	High	SM 05 Cerebrovascular	43.1391	65-75
70	Men	Low	SM 06 Other Vascular	397.633	65-75
70	Women	Low	SM 06 Other Vascular	69.6843	65-75
70	Men	Medium-low	SM 06 Other Vascular	256.963	65-75
70	Women	Medium-low	SM 06 Other Vascular	36.2355	65-75
70	Men	Medium-high	SM 06 Other Vascular	113.824	65-75
70	Women	Medium-high	SM 06 Other Vascular	20.5394	65-75
70	Men	High	SM 06 Other Vascular	153.188	65-75
70	Women	High	SM 06 Other Vascular	28.9012	65-75
70	Men	Low	SM 07 Diabetes	223.338	65-75
70	Women	Low	SM 07 Diabetes	39.4771	65-75
70	Men	Medium-low	SM 07 Diabetes	130.922	65-75
70	Women	Medium-low	SM 07 Diabetes	14.687	65-75
70	Men	Medium-high	SM 07 Diabetes	52.4396	65-75
70	Women	Medium-high	SM 07 Diabetes	5.83366	65-75
70	Men	High	SM 07 Diabetes	50.1929	65-75
70	Women	High	SM 07 Diabetes	4.99276	65-75
70	Men	Low	SM 08 IPT	255.043	65-75
70	Women	Low	SM 08 IPT	24.4921	65-75
70	Men	Medium-low	SM 08 IPT	160.769	65-75
70	Women	Medium-low	SM 08 IPT	15.8125	65-75
70	Men	Medium-high	SM 08 IPT	67.6606	65-75
70	Women	Medium-high	SM 08 IPT	6.71912	65-75
70	Men	High	SM 08 IPT	60.835	65-75
70	Women	High	SM 08 IPT	10.2418	65-75
70	Men	Low	SM 09 COPD	1936.21	65-75
70	Women	Low	SM 09 COPD	329.442	65-75
70	Men	Medium-low	SM 09 COPD	1071.74	65-75
70	Women	Medium-low	SM 09 COPD	183.553	65-75
70	Men	Medium-high	SM 09 COPD	365.33	65-75
70	Women	Medium-high	SM 09 COPD	125.665	65-75
70	Men	High	SM 09 COPD	412.957	65-75
70	Women	High	SM 09 COPD	108.37	65-75
70	Men	Low	SM Other (non-smoking-related)	0	65-75
70	Women	Low	SM Other (non-smoking-related)	0	65-75
70	Men	Medium-low	SM Other (non-smoking-related)	0	65-75
70	Women	Medium-low	SM Other (non-smoking-related)	0	65-75
70	Men	Medium-high	SM Other (non-smoking-related)	0	65-75
70	Women	Medium-high	SM Other (non-smoking-related)	0	65-75
70	Men	High	SM Other (non-smoking-related)	0	65-75
70	Women	High	SM Other (non-smoking-related)	0	65-75
70	Men	Low	NS 01 Cancer	531.789	65-75
70	Women	Low	NS 01 Cancer	330.966	65-75
70	Men	Medium-low	NS 01 Cancer	390.48	65-75
70	Women	Medium-low	NS 01 Cancer	179.267	65-75
70	Men	Medium-high	NS 01 Cancer	160.486	65-75
70	Women	Medium-high	NS 01 Cancer	63.8305	65-75
70	Men	High	NS 01 Cancer	188.548	65-75
70	Women	High	NS 01 Cancer	67.1427	65-75
70	Men	Low	NS 02 Cancer, others	4666.51	65-75
70	Women	Low	NS 02 Cancer, others	3626.41	65-75
70	Men	Medium-low	NS 02 Cancer, others	3490.56	65-75
70	Women	Medium-low	NS 02 Cancer, others	1747.14	65-75
70	Men	Medium-high	NS 02 Cancer, others	1411.09	65-75
70	Women	Medium-high	NS 02 Cancer, others	611.02	65-75
70	Men	High	NS 02 Cancer, others	1825.98	65-75
70	Women	High	NS 02 Cancer, others	584.362	65-75
70	Men	Low	NS 03 IHD	2147.28	65-75
70	Women	Low	NS 03 IHD	1421.61	65-75
70	Men	Medium-low	NS 03 IHD	1360.81	65-75
70	Women	Medium-low	NS 03 IHD	502.731	65-75
70	Men	Medium-high	NS 03 IHD	602.561	65-75
70	Women	Medium-high	NS 03 IHD	143.266	65-75
70	Men	High	NS 03 IHD	741.341	65-75
70	Women	High	NS 03 IHD	117.725	65-75
70	Men	Low	NS 04 Other Heart	1765.56	65-75
70	Women	Low	NS 04 Other Heart	2008.46	65-75
70	Men	Medium-low	NS 04 Other Heart	1092.45	65-75
70	Women	Medium-low	NS 04 Other Heart	711.116	65-75
70	Men	Medium-high	NS 04 Other Heart	453.226	65-75
70	Women	Medium-high	NS 04 Other Heart	243.8	65-75
70	Men	High	NS 04 Other Heart	591.592	65-75
70	Women	High	NS 04 Other Heart	230.545	65-75
70	Men	Low	NS 05 Cerebrovascular	1418.34	65-75
70	Women	Low	NS 05 Cerebrovascular	1420.74	65-75
70	Men	Medium-low	NS 05 Cerebrovascular	895.699	65-75
70	Women	Medium-low	NS 05 Cerebrovascular	564.338	65-75
70	Men	Medium-high	NS 05 Cerebrovascular	336.59	65-75
70	Women	Medium-high	NS 05 Cerebrovascular	180.512	65-75
70	Men	High	NS 05 Cerebrovascular	444.855	65-75
70	Women	High	NS 05 Cerebrovascular	166.34	65-75
70	Men	Low	NS 06 Other Vascular	228.947	65-75
70	Women	Low	NS 06 Other Vascular	160.047	65-75
70	Men	Medium-low	NS 06 Other Vascular	145.764	65-75
70	Women	Medium-low	NS 06 Other Vascular	60.6652	65-75
70	Men	Medium-high	NS 06 Other Vascular	65.0499	65-75
70	Women	Medium-high	NS 06 Other Vascular	17.5676	65-75
70	Men	High	NS 06 Other Vascular	92.6324	65-75
70	Women	High	NS 06 Other Vascular	23.3599	65-75
70	Men	Low	NS 07 Diabetes	597.529	65-75
70	Women	Low	NS 07 Diabetes	645.608	65-75
70	Men	Medium-low	NS 07 Diabetes	360.983	65-75
70	Women	Medium-low	NS 07 Diabetes	173.077	65-75
70	Men	Medium-high	NS 07 Diabetes	143.298	65-75
70	Women	Medium-high	NS 07 Diabetes	37.8088	65-75
70	Men	High	NS 07 Diabetes	135.296	65-75
70	Women	High	NS 07 Diabetes	29.5152	65-75
70	Men	Low	NS 08 IPT	417.838	65-75
70	Women	Low	NS 08 IPT	348.686	65-75
70	Men	Medium-low	NS 08 IPT	264.698	65-75
70	Women	Medium-low	NS 08 IPT	162.981	65-75
70	Men	Medium-high	NS 08 IPT	111.429	65-75
70	Women	Medium-high	NS 08 IPT	36.9396	65-75
70	Men	High	NS 08 IPT	102.727	65-75
70	Women	High	NS 08 IPT	52.1278	65-75
70	Men	Low	NS 09 COPD	218.782	65-75
70	Women	Low	NS 09 COPD	91.0747	65-75
70	Men	Medium-low	NS 09 COPD	120.145	65-75
70	Women	Medium-low	NS 09 COPD	36.7181	65-75
70	Men	Medium-high	NS 09 COPD	41.157	65-75
70	Women	Medium-high	NS 09 COPD	13.4532	65-75
70	Men	High	NS 09 COPD	48.6806	65-75
70	Women	High	NS 09 COPD	10.7235	65-75
70	Men	Low	NS Other (non-smoking-related)	14193.1	65-75
70	Women	Low	NS Other (non-smoking-related)	13471.3	65-75
70	Men	Medium-low	NS Other (non-smoking-related)	9228.73	65-75
70	Women	Medium-low	NS Other (non-smoking-related)	5726.23	65-75
70	Men	Medium-high	NS Other (non-smoking-related)	3745.44	65-75
70	Women	Medium-high	NS Other (non-smoking-related)	2029.11	65-75
70	Men	High	NS Other (non-smoking-related)	4799.68	65-75
70	Women	High	NS Other (non-smoking-related)	1998.33	65-75
75	Men	Low	SM 01 Cancer	4379.49	75+
75	Women	Low	SM 01 Cancer	296.814	75+
75	Men	Medium-low	SM 01 Cancer	1989.54	75+
75	Women	Medium-low	SM 01 Cancer	221.037	75+
75	Men	Medium-high	SM 01 Cancer	836.126	75+
75	Women	Medium-high	SM 01 Cancer	170.158	75+
75	Men	High	SM 01 Cancer	1108.83	75+
75	Women	High	SM 01 Cancer	147.814	75+
75	Men	Low	SM 02 Cancer, others	2272.43	75+
75	Women	Low	SM 02 Cancer, others	101.599	75+
75	Men	Medium-low	SM 02 Cancer, others	1101.22	75+
75	Women	Medium-low	SM 02 Cancer, others	79.8201	75+
75	Men	Medium-high	SM 02 Cancer, others	469.034	75+
75	Women	Medium-high	SM 02 Cancer, others	56.3207	75+
75	Men	High	SM 02 Cancer, others	596.282	75+
75	Women	High	SM 02 Cancer, others	46.6617	75+
75	Men	Low	SM 03 IHD	994.067	75+
75	Women	Low	SM 03 IHD	81.9163	75+
75	Men	Medium-low	SM 03 IHD	437.172	75+
75	Women	Medium-low	SM 03 IHD	46.354	75+
75	Men	Medium-high	SM 03 IHD	213.969	75+
75	Women	Medium-high	SM 03 IHD	32.2916	75+
75	Men	High	SM 03 IHD	247.458	75+
75	Women	High	SM 03 IHD	24.6831	75+
75	Men	Low	SM 04 Other Heart	493.822	75+
75	Women	Low	SM 04 Other Heart	92.0303	75+
75	Men	Medium-low	SM 04 Other Heart	212.293	75+
75	Women	Medium-low	SM 04 Other Heart	51.6502	75+
75	Men	Medium-high	SM 04 Other Heart	95.3746	75+
75	Women	Medium-high	SM 04 Other Heart	30.5688	75+
75	Men	High	SM 04 Other Heart	101.421	75+
75	Women	High	SM 04 Other Heart	26.8989	75+
75	Men	Low	SM 05 Cerebrovascular	326.236	75+
75	Women	Low	SM 05 Cerebrovascular	35.0556	75+
75	Men	Medium-low	SM 05 Cerebrovascular	128.821	75+
75	Women	Medium-low	SM 05 Cerebrovascular	22.3637	75+
75	Men	Medium-high	SM 05 Cerebrovascular	58.6234	75+
75	Women	Medium-high	SM 05 Cerebrovascular	16.171	75+
75	Men	High	SM 05 Cerebrovascular	63.8662	75+
75	Women	High	SM 05 Cerebrovascular	12.7116	75+
75	Men	Low	SM 06 Other Vascular	376.235	75+
75	Women	Low	SM 06 Other Vascular	29.8895	75+
75	Men	Medium-low	SM 06 Other Vascular	165.09	75+
75	Women	Medium-low	SM 06 Other Vascular	20.8711	75+
75	Men	Medium-high	SM 06 Other Vascular	79.4006	75+
75	Women	Medium-high	SM 06 Other Vascular	17.8884	75+
75	Men	High	SM 06 Other Vascular	96.2353	75+
75	Women	High	SM 06 Other Vascular	9.95995	75+
75	Men	Low	SM 07 Diabetes	38.9184	75+
75	Women	Low	SM 07 Diabetes	4.73019	75+
75	Men	Medium-low	SM 07 Diabetes	14.5789	75+
75	Women	Medium-low	SM 07 Diabetes	2.05424	75+
75	Men	Medium-high	SM 07 Diabetes	6.17687	75+
75	Women	Medium-high	SM 07 Diabetes	1.54167	75+
75	Men	High	SM 07 Diabetes	6.94729	75+
75	Women	High	SM 07 Diabetes	0.90063	75+
75	Men	Low	SM 08 IPT	274.293	75+
75	Women	Low	SM 08 IPT	16.5635	75+
75	Men	Medium-low	SM 08 IPT	102.349	75+
75	Women	Medium-low	SM 08 IPT	9.53317	75+
75	Men	Medium-high	SM 08 IPT	47.3002	75+
75	Women	Medium-high	SM 08 IPT	6.33446	75+
75	Men	High	SM 08 IPT	56.6155	75+
75	Women	High	SM 08 IPT	6.7554	75+
75	Men	Low	SM 09 COPD	2958.51	75+
75	Women	Low	SM 09 COPD	180.187	75+
75	Men	Medium-low	SM 09 COPD	1015.89	75+
75	Women	Medium-low	SM 09 COPD	104.542	75+
75	Men	Medium-high	SM 09 COPD	395.889	75+
75	Women	Medium-high	SM 09 COPD	73.0648	75+
75	Men	High	SM 09 COPD	442.521	75+
75	Women	High	SM 09 COPD	76.848	75+
75	Men	Low	SM Other (non-smoking-related)	0	75+
75	Women	Low	SM Other (non-smoking-related)	0	75+
75	Men	Medium-low	SM Other (non-smoking-related)	0	75+
75	Women	Medium-low	SM Other (non-smoking-related)	0	75+
75	Men	Medium-high	SM Other (non-smoking-related)	0	75+
75	Women	Medium-high	SM Other (non-smoking-related)	0	75+
75	Men	High	SM Other (non-smoking-related)	0	75+
75	Women	High	SM Other (non-smoking-related)	0	75+
75	Men	Low	NS 01 Cancer	917.564	75+
75	Women	Low	NS 01 Cancer	725.604	75+
75	Men	Medium-low	NS 01 Cancer	375.16	75+
75	Women	Medium-low	NS 01 Cancer	207.12	75+
75	Men	Medium-high	NS 01 Cancer	152.455	75+
75	Women	Medium-high	NS 01 Cancer	73.324	75+
75	Men	High	NS 01 Cancer	227.826	75+
75	Women	High	NS 01 Cancer	78.1289	75+
75	Men	Low	NS 02 Cancer, others	6534.71	75+
75	Women	Low	NS 02 Cancer, others	5368.23	75+
75	Men	Medium-low	NS 02 Cancer, others	2890.05	75+
75	Women	Medium-low	NS 02 Cancer, others	1631.41	75+
75	Men	Medium-high	NS 02 Cancer, others	1210.54	75+
75	Women	Medium-high	NS 02 Cancer, others	538.8	75+
75	Men	High	NS 02 Cancer, others	1661.73	75+
75	Women	High	NS 02 Cancer, others	529.163	75+
75	Men	Low	NS 03 IHD	3889.2	75+
75	Women	Low	NS 03 IHD	2960.42	75+
75	Men	Medium-low	NS 03 IHD	1552.34	75+
75	Women	Medium-low	NS 03 IHD	652.914	75+
75	Men	Medium-high	NS 03 IHD	742.142	75+
75	Women	Medium-high	NS 03 IHD	216.105	75+
75	Men	High	NS 03 IHD	942.652	75+
75	Women	High	NS 03 IHD	190.316	75+
75	Men	Low	NS 04 Other Heart	3602.84	75+
75	Women	Low	NS 04 Other Heart	4778.1	75+
75	Men	Medium-low	NS 04 Other Heart	1388.68	75+
75	Women	Medium-low	NS 04 Other Heart	1057.75	75+
75	Men	Medium-high	NS 04 Other Heart	600.519	75+
75	Women	Medium-high	NS 04 Other Heart	304.809	75+
75	Men	High	NS 04 Other Heart	728.059	75+
75	Women	High	NS 04 Other Heart	295.186	75+
75	Men	Low	NS 05 Cerebrovascular	3091.58	75+
75	Women	Low	NS 05 Cerebrovascular	3433.58	75+
75	Men	Medium-low	NS 05 Cerebrovascular	1098.14	75+
75	Women	Medium-low	NS 05 Cerebrovascular	817.217	75+
75	Men	Medium-high	NS 05 Cerebrovascular	482.925	75+
75	Women	Medium-high	NS 05 Cerebrovascular	258.582	75+
75	Men	High	NS 05 Cerebrovascular	593.802	75+
75	Women	High	NS 05 Cerebrovascular	275.32	75+
75	Men	Low	NS 06 Other Vascular	520.062	75+
75	Women	Low	NS 06 Other Vascular	360.947	75+
75	Men	Medium-low	NS 06 Other Vascular	203.051	75+
75	Women	Medium-low	NS 06 Other Vascular	95.9551	75+
75	Men	Medium-high	NS 06 Other Vascular	93.1654	75+
75	Women	Medium-high	NS 06 Other Vascular	37.3385	75+
75	Men	High	NS 06 Other Vascular	131.761	75+
75	Women	High	NS 06 Other Vascular	26.15	75+
75	Men	Low	NS 07 Diabetes	1211.58	75+
75	Women	Low	NS 07 Diabetes	1457.33	75+
75	Men	Medium-low	NS 07 Diabetes	432.688	75+
75	Women	Medium-low	NS 07 Diabetes	253.63	75+
75	Men	Medium-high	NS 07 Diabetes	190.785	75+
75	Women	Medium-high	NS 07 Diabetes	95.8617	75+
75	Men	High	NS 07 Diabetes	202.324	75+
75	Women	High	NS 07 Diabetes	57.9472	75+
75	Men	Low	NS 08 IPT	986.05	75+
75	Women	Low	NS 08 IPT	933.143	75+
75	Men	Medium-low	NS 08 IPT	340.781	75+
75	Women	Medium-low	NS 08 IPT	203.666	75+
75	Men	Medium-high	NS 08 IPT	157.776	75+
75	Women	Medium-high	NS 08 IPT	60.9917	75+
75	Men	High	NS 08 IPT	194.835	75+
75	Women	High	NS 08 IPT	83.0128	75+
75	Men	Low	NS 09 COPD	608.228	75+
75	Women	Low	NS 09 COPD	432.556	75+
75	Men	Medium-low	NS 09 COPD	187.929	75+
75	Women	Medium-low	NS 09 COPD	97.3029	75+
75	Men	Medium-high	NS 09 COPD	70.7959	75+
75	Women	Medium-high	NS 09 COPD	31.9769	75+
75	Men	High	NS 09 COPD	89.2356	75+
75	Women	High	NS 09 COPD	39.5218	75+
75	Men	Low	NS Other (non-smoking-related)	22400.7	75+
75	Women	Low	NS Other (non-smoking-related)	24148.3	75+
75	Men	Medium-low	NS Other (non-smoking-related)	9073.15	75+
75	Women	Medium-low	NS Other (non-smoking-related)	6557.41	75+
75	Men	Medium-high	NS Other (non-smoking-related)	3848.47	75+
75	Women	Medium-high	NS Other (non-smoking-related)	2195.3	75+
75	Men	High	NS Other (non-smoking-related)	5316.7	75+
75	Women	High	NS Other (non-smoking-related)	2001	75+
80	Men	Low	SM 01 Cancer	4963.53	75+
80	Women	Low	SM 01 Cancer	385.334	75+
80	Men	Medium-low	SM 01 Cancer	1330.6	75+
80	Women	Medium-low	SM 01 Cancer	175.392	75+
80	Men	Medium-high	SM 01 Cancer	655.979	75+
80	Women	Medium-high	SM 01 Cancer	126.201	75+
80	Men	High	SM 01 Cancer	857.297	75+
80	Women	High	SM 01 Cancer	110.13	75+
80	Men	Low	SM 02 Cancer, others	3188.73	75+
80	Women	Low	SM 02 Cancer, others	163.68	75+
80	Men	Medium-low	SM 02 Cancer, others	950.13	75+
80	Women	Medium-low	SM 02 Cancer, others	88.7821	75+
80	Men	Medium-high	SM 02 Cancer, others	414.636	75+
80	Women	Medium-high	SM 02 Cancer, others	64.9724	75+
80	Men	High	SM 02 Cancer, others	557.508	75+
80	Women	High	SM 02 Cancer, others	50.2416	75+
80	Men	Low	SM 03 IHD	1658.27	75+
80	Women	Low	SM 03 IHD	184.184	75+
80	Men	Medium-low	SM 03 IHD	464.955	75+
80	Women	Medium-low	SM 03 IHD	74.6978	75+
80	Men	Medium-high	SM 03 IHD	215.597	75+
80	Women	Medium-high	SM 03 IHD	52.4502	75+
80	Men	High	SM 03 IHD	277.492	75+
80	Women	High	SM 03 IHD	38.249	75+
80	Men	Low	SM 04 Other Heart	1041.28	75+
80	Women	Low	SM 04 Other Heart	244.33	75+
80	Men	Medium-low	SM 04 Other Heart	285.084	75+
80	Women	Medium-low	SM 04 Other Heart	103.149	75+
80	Men	Medium-high	SM 04 Other Heart	123.829	75+
80	Women	Medium-high	SM 04 Other Heart	60.684	75+
80	Men	High	SM 04 Other Heart	158.991	75+
80	Women	High	SM 04 Other Heart	49.4432	75+
80	Men	Low	SM 05 Cerebrovascular	583.569	75+
80	Women	Low	SM 05 Cerebrovascular	82.4076	75+
80	Men	Medium-low	SM 05 Cerebrovascular	157.086	75+
80	Women	Medium-low	SM 05 Cerebrovascular	40.665	75+
80	Men	Medium-high	SM 05 Cerebrovascular	71.629	75+
80	Women	Medium-high	SM 05 Cerebrovascular	30.3485	75+
80	Men	High	SM 05 Cerebrovascular	92.2891	75+
80	Women	High	SM 05 Cerebrovascular	19.7164	75+
80	Men	Low	SM 06 Other Vascular	601.942	75+
80	Women	Low	SM 06 Other Vascular	66.2784	75+
80	Men	Medium-low	SM 06 Other Vascular	173.591	75+
80	Women	Medium-low	SM 06 Other Vascular	27.855	75+
80	Men	Medium-high	SM 06 Other Vascular	82.7107	75+
80	Women	Medium-high	SM 06 Other Vascular	19.3486	75+
80	Men	High	SM 06 Other Vascular	103.897	75+
80	Women	High	SM 06 Other Vascular	15.3592	75+
80	Men	Low	SM 07 Diabetes	75.1878	75+
80	Women	Low	SM 07 Diabetes	10.0365	75+
80	Men	Medium-low	SM 07 Diabetes	17.1004	75+
80	Women	Medium-low	SM 07 Diabetes	3.64524	75+
80	Men	Medium-high	SM 07 Diabetes	6.94241	75+
80	Women	Medium-high	SM 07 Diabetes	1.63136	75+
80	Men	High	SM 07 Diabetes	9.66443	75+
80	Women	High	SM 07 Diabetes	1.5001	75+
80	Men	Low	SM 08 IPT	637.916	75+
80	Women	Low	SM 08 IPT	45.6692	75+
80	Men	Medium-low	SM 08 IPT	156.286	75+
80	Women	Medium-low	SM 08 IPT	19.8692	75+
80	Men	Medium-high	SM 08 IPT	77.4506	75+
80	Women	Medium-high	SM 08 IPT	12.6661	75+
80	Men	High	SM 08 IPT	87.6764	75+
80	Women	High	SM 08 IPT	9.21676	75+
80	Men	Low	SM 09 COPD	5653.46	75+
80	Women	Low	SM 09 COPD	375.21	75+
80	Men	Medium-low	SM 09 COPD	1158.35	75+
80	Women	Medium-low	SM 09 COPD	144.676	75+
80	Men	Medium-high	SM 09 COPD	502.206	75+
80	Women	Medium-high	SM 09 COPD	95.3703	75+
80	Men	High	SM 09 COPD	553.096	75+
80	Women	High	SM 09 COPD	76.3542	75+
80	Men	Low	SM Other (non-smoking-related)	0	75+
80	Women	Low	SM Other (non-smoking-related)	0	75+
80	Men	Medium-low	SM Other (non-smoking-related)	0	75+
80	Women	Medium-low	SM Other (non-smoking-related)	0	75+
80	Men	Medium-high	SM Other (non-smoking-related)	0	75+
80	Women	Medium-high	SM Other (non-smoking-related)	0	75+
80	Men	High	SM Other (non-smoking-related)	0	75+
80	Women	High	SM Other (non-smoking-related)	0	75+
80	Men	Low	NS 01 Cancer	1039.93	75+
80	Women	Low	NS 01 Cancer	942.002	75+
80	Men	Medium-low	NS 01 Cancer	250.906	75+
80	Women	Medium-low	NS 01 Cancer	164.349	75+
80	Men	Medium-high	NS 01 Cancer	119.608	75+
80	Women	Medium-high	NS 01 Cancer	54.3821	75+
80	Men	High	NS 01 Cancer	176.144	75+
80	Women	High	NS 01 Cancer	58.2103	75+
80	Men	Low	NS 02 Cancer, others	9169.66	75+
80	Women	Low	NS 02 Cancer, others	8648.42	75+
80	Men	Medium-low	NS 02 Cancer, others	2493.52	75+
80	Women	Medium-low	NS 02 Cancer, others	1814.58	75+
80	Men	Medium-high	NS 02 Cancer, others	1070.15	75+
80	Women	Medium-high	NS 02 Cancer, others	621.567	75+
80	Men	High	NS 02 Cancer, others	1553.67	75+
80	Women	High	NS 02 Cancer, others	569.761	75+
80	Men	Low	NS 03 IHD	6487.84	75+
80	Women	Low	NS 03 IHD	6656.35	75+
80	Men	Medium-low	NS 03 IHD	1651	75+
80	Women	Medium-low	NS 03 IHD	1052.15	75+
80	Men	Medium-high	NS 03 IHD	747.789	75+
80	Women	Medium-high	NS 03 IHD	351.013	75+
80	Men	High	NS 03 IHD	1057.06	75+
80	Women	High	NS 03 IHD	294.914	75+
80	Men	Low	NS 04 Other Heart	7596.99	75+
80	Women	Low	NS 04 Other Heart	12685.3	75+
80	Men	Medium-low	NS 04 Other Heart	1864.82	75+
80	Women	Medium-low	NS 04 Other Heart	2112.41	75+
80	Men	Medium-high	NS 04 Other Heart	779.679	75+
80	Women	Medium-high	NS 04 Other Heart	605.094	75+
80	Men	High	NS 04 Other Heart	1141.33	75+
80	Women	High	NS 04 Other Heart	542.584	75+
80	Men	Low	NS 05 Cerebrovascular	5530.21	75+
80	Women	Low	NS 05 Cerebrovascular	8071.55	75+
80	Men	Medium-low	NS 05 Cerebrovascular	1339.09	75+
80	Women	Medium-low	NS 05 Cerebrovascular	1485.99	75+
80	Men	Medium-high	NS 05 Cerebrovascular	590.062	75+
80	Women	Medium-high	NS 05 Cerebrovascular	485.289	75+
80	Men	High	NS 05 Cerebrovascular	858.066	75+
80	Women	High	NS 05 Cerebrovascular	427.034	75+
80	Men	Low	NS 06 Other Vascular	832.052	75+
80	Women	Low	NS 06 Other Vascular	800.384	75+
80	Men	Medium-low	NS 06 Other Vascular	213.506	75+
80	Women	Medium-low	NS 06 Other Vascular	128.063	75+
80	Men	Medium-high	NS 06 Other Vascular	97.0493	75+
80	Women	Medium-high	NS 06 Other Vascular	40.3863	75+
80	Men	High	NS 06 Other Vascular	142.251	75+
80	Women	High	NS 06 Other Vascular	40.3258	75+
80	Men	Low	NS 07 Diabetes	2340.7	75+
80	Women	Low	NS 07 Diabetes	3092.17	75+
80	Men	Medium-low	NS 07 Diabetes	507.521	75+
80	Women	Medium-low	NS 07 Diabetes	450.065	75+
80	Men	Medium-high	NS 07 Diabetes	214.43	75+
80	Women	Medium-high	NS 07 Diabetes	101.439	75+
80	Men	High	NS 07 Diabetes	281.455	75+
80	Women	High	NS 07 Diabetes	96.5174	75+
80	Men	Low	NS 08 IPT	2293.23	75+
80	Women	Low	NS 08 IPT	2572.88	75+
80	Men	Medium-low	NS 08 IPT	520.366	75+
80	Women	Medium-low	NS 08 IPT	424.484	75+
80	Men	Medium-high	NS 08 IPT	258.347	75+
80	Women	Medium-high	NS 08 IPT	121.956	75+
80	Men	High	NS 08 IPT	301.727	75+
80	Women	High	NS 08 IPT	113.259	75+
80	Men	Low	NS 09 COPD	1162.27	75+
80	Women	Low	NS 09 COPD	900.725	75+
80	Men	Medium-low	NS 09 COPD	214.281	75+
80	Women	Medium-low	NS 09 COPD	134.658	75+
80	Men	Medium-high	NS 09 COPD	89.8084	75+
80	Women	Medium-high	NS 09 COPD	41.7389	75+
80	Men	High	NS 09 COPD	111.533	75+
80	Women	High	NS 09 COPD	39.2678	75+
80	Men	Low	NS Other (non-smoking-related)	42170.9	75+
80	Women	Low	NS Other (non-smoking-related)	54270.9	75+
80	Men	Medium-low	NS Other (non-smoking-related)	10715.4	75+
80	Women	Medium-low	NS Other (non-smoking-related)	10394.6	75+
80	Men	Medium-high	NS Other (non-smoking-related)	4867.04	75+
80	Women	Medium-high	NS Other (non-smoking-related)	3363.12	75+
80	Men	High	NS Other (non-smoking-related)	6594.71	75+
80	Women	High	NS Other (non-smoking-related)	3015.38	75+
85	Men	Low	SM 01 Cancer	3254.39	75+
85	Women	Low	SM 01 Cancer	358.847	75+
85	Men	Medium-low	SM 01 Cancer	692.741	75+
85	Women	Medium-low	SM 01 Cancer	124.899	75+
85	Men	Medium-high	SM 01 Cancer	296.137	75+
85	Women	Medium-high	SM 01 Cancer	86.6693	75+
85	Men	High	SM 01 Cancer	488.835	75+
85	Women	High	SM 01 Cancer	78.4728	75+
85	Men	Low	SM 02 Cancer, others	2743.79	75+
85	Women	Low	SM 02 Cancer, others	179.49	75+
85	Men	Medium-low	SM 02 Cancer, others	602.343	75+
85	Women	Medium-low	SM 02 Cancer, others	78.6883	75+
85	Men	Medium-high	SM 02 Cancer, others	280.385	75+
85	Women	Medium-high	SM 02 Cancer, others	59.1296	75+
85	Men	High	SM 02 Cancer, others	389.741	75+
85	Women	High	SM 02 Cancer, others	42.0559	75+
85	Men	Low	SM 03 IHD	1896.66	75+
85	Women	Low	SM 03 IHD	278.062	75+
85	Men	Medium-low	SM 03 IHD	400.406	75+
85	Women	Medium-low	SM 03 IHD	106.213	75+
85	Men	Medium-high	SM 03 IHD	201.395	75+
85	Women	Medium-high	SM 03 IHD	75.7909	75+
85	Men	High	SM 03 IHD	264.63	75+
85	Women	High	SM 03 IHD	53.8017	75+
85	Men	Low	SM 04 Other Heart	1464.27	75+
85	Women	Low	SM 04 Other Heart	433.176	75+
85	Men	Medium-low	SM 04 Other Heart	294.999	75+
85	Women	Medium-low	SM 04 Other Heart	163.874	75+
85	Men	Medium-high	SM 04 Other Heart	147.809	75+
85	Women	Medium-high	SM 04 Other Heart	108.444	75+
85	Men	High	SM 04 Other Heart	178.705	75+
85	Women	High	SM 04 Other Heart	83.4483	75+
85	Men	Low	SM 05 Cerebrovascular	713.183	75+
85	Women	Low	SM 05 Cerebrovascular	133.007	75+
85	Men	Medium-low	SM 05 Cerebrovascular	149.214	75+
85	Women	Medium-low	SM 05 Cerebrovascular	54.4221	75+
85	Men	Medium-high	SM 05 Cerebrovascular	66.2627	75+
85	Women	Medium-high	SM 05 Cerebrovascular	44.2842	75+
85	Men	High	SM 05 Cerebrovascular	87.3987	75+
85	Women	High	SM 05 Cerebrovascular	26.0745	75+
85	Men	Low	SM 06 Other Vascular	671.364	75+
85	Women	Low	SM 06 Other Vascular	117.132	75+
85	Men	Medium-low	SM 06 Other Vascular	137.024	75+
85	Women	Medium-low	SM 06 Other Vascular	43.0525	75+
85	Men	Medium-high	SM 06 Other Vascular	74.2396	75+
85	Women	Medium-high	SM 06 Other Vascular	32.0068	75+
85	Men	High	SM 06 Other Vascular	86.8329	75+
85	Women	High	SM 06 Other Vascular	19.19	75+
85	Men	Low	SM 07 Diabetes	90.1763	75+
85	Women	Low	SM 07 Diabetes	16.2849	75+
85	Men	Medium-low	SM 07 Diabetes	16.6127	75+
85	Women	Medium-low	SM 07 Diabetes	5.472	75+
85	Men	Medium-high	SM 07 Diabetes	7.37448	75+
85	Women	Medium-high	SM 07 Diabetes	2.75876	75+
85	Men	High	SM 07 Diabetes	9.8166	75+
85	Women	High	SM 07 Diabetes	2.22039	75+
85	Men	Low	SM 08 IPT	914.972	75+
85	Women	Low	SM 08 IPT	80.4936	75+
85	Men	Medium-low	SM 08 IPT	197.289	75+
85	Women	Medium-low	SM 08 IPT	30.5051	75+
85	Men	Medium-high	SM 08 IPT	89.2974	75+
85	Women	Medium-high	SM 08 IPT	22.9442	75+
85	Men	High	SM 08 IPT	114.711	75+
85	Women	High	SM 08 IPT	16.1525	75+
85	Men	Low	SM 09 COPD	6145.88	75+
85	Women	Low	SM 09 COPD	590.14	75+
85	Men	Medium-low	SM 09 COPD	1020.19	75+
85	Women	Medium-low	SM 09 COPD	148.185	75+
85	Men	Medium-high	SM 09 COPD	464.984	75+
85	Women	Medium-high	SM 09 COPD	110.092	75+
85	Men	High	SM 09 COPD	518.088	75+
85	Women	High	SM 09 COPD	82.4101	75+
85	Men	Low	SM Other (non-smoking-related)	0	75+
85	Women	Low	SM Other (non-smoking-related)	0	75+
85	Men	Medium-low	SM Other (non-smoking-related)	0	75+
85	Women	Medium-low	SM Other (non-smoking-related)	0	75+
85	Men	Medium-high	SM Other (non-smoking-related)	0	75+
85	Women	Medium-high	SM Other (non-smoking-related)	0	75+
85	Men	High	SM Other (non-smoking-related)	0	75+
85	Women	High	SM Other (non-smoking-related)	0	75+
85	Men	Low	NS 01 Cancer	681.839	75+
85	Women	Low	NS 01 Cancer	877.252	75+
85	Men	Medium-low	NS 01 Cancer	130.627	75+
85	Women	Medium-low	NS 01 Cancer	117.035	75+
85	Men	Medium-high	NS 01 Cancer	53.9962	75+
85	Women	Medium-high	NS 01 Cancer	37.3473	75+
85	Men	High	NS 01 Cancer	100.438	75+
85	Women	High	NS 01 Cancer	41.4777	75+
85	Men	Low	NS 02 Cancer, others	7890.16	75+
85	Women	Low	NS 02 Cancer, others	9483.76	75+
85	Men	Medium-low	NS 02 Cancer, others	1580.79	75+
85	Women	Medium-low	NS 02 Cancer, others	1608.27	75+
85	Men	Medium-high	NS 02 Cancer, others	723.654	75+
85	Women	Medium-high	NS 02 Cancer, others	565.671	75+
85	Men	High	NS 02 Cancer, others	1086.13	75+
85	Women	High	NS 02 Cancer, others	476.932	75+
85	Men	Low	NS 03 IHD	7420.52	75+
85	Women	Low	NS 03 IHD	10049	75+
85	Men	Medium-low	NS 03 IHD	1421.79	75+
85	Women	Medium-low	NS 03 IHD	1496.04	75+
85	Men	Medium-high	NS 03 IHD	698.531	75+
85	Women	Medium-high	NS 03 IHD	507.215	75+
85	Men	High	NS 03 IHD	1008.06	75+
85	Women	High	NS 03 IHD	414.83	75+
85	Men	Low	NS 04 Other Heart	10683	75+
85	Women	Low	NS 04 Other Heart	22490	75+
85	Men	Medium-low	NS 04 Other Heart	1929.68	75+
85	Women	Medium-low	NS 04 Other Heart	3356.02	75+
85	Men	Medium-high	NS 04 Other Heart	930.669	75+
85	Women	Medium-high	NS 04 Other Heart	1081.32	75+
85	Men	High	NS 04 Other Heart	1282.85	75+
85	Women	High	NS 04 Other Heart	915.753	75+
85	Men	Low	NS 05 Cerebrovascular	6758.5	75+
85	Women	Low	NS 05 Cerebrovascular	13027.6	75+
85	Men	Medium-low	NS 05 Cerebrovascular	1271.99	75+
85	Women	Medium-low	NS 05 Cerebrovascular	1988.7	75+
85	Men	Medium-high	NS 05 Cerebrovascular	545.856	75+
85	Women	Medium-high	NS 05 Cerebrovascular	708.128	75+
85	Men	High	NS 05 Cerebrovascular	812.597	75+
85	Women	High	NS 05 Cerebrovascular	564.745	75+
85	Men	Low	NS 06 Other Vascular	928.011	75+
85	Women	Low	NS 06 Other Vascular	1414.49	75+
85	Men	Medium-low	NS 06 Other Vascular	168.531	75+
85	Women	Medium-low	NS 06 Other Vascular	197.934	75+
85	Men	Medium-high	NS 06 Other Vascular	87.1097	75+
85	Women	Medium-high	NS 06 Other Vascular	66.8078	75+
85	Men	High	NS 06 Other Vascular	118.887	75+
85	Women	High	NS 06 Other Vascular	50.3835	75+
85	Men	Low	NS 07 Diabetes	2807.31	75+
85	Women	Low	NS 07 Diabetes	5017.25	75+
85	Men	Medium-low	NS 07 Diabetes	493.046	75+
85	Women	Medium-low	NS 07 Diabetes	675.607	75+
85	Men	Medium-high	NS 07 Diabetes	227.775	75+
85	Women	Medium-high	NS 07 Diabetes	171.541	75+
85	Men	High	NS 07 Diabetes	285.887	75+
85	Women	High	NS 07 Diabetes	142.862	75+
85	Men	Low	NS 08 IPT	3289.21	75+
85	Women	Low	NS 08 IPT	4534.79	75+
85	Men	Medium-low	NS 08 IPT	656.891	75+
85	Women	Medium-low	NS 08 IPT	651.71	75+
85	Men	Medium-high	NS 08 IPT	297.864	75+
85	Women	Medium-high	NS 08 IPT	220.92	75+
85	Men	High	NS 08 IPT	394.764	75+
85	Women	High	NS 08 IPT	198.488	75+
85	Men	Low	NS 09 COPD	1263.51	75+
85	Women	Low	NS 09 COPD	1416.68	75+
85	Men	Medium-low	NS 09 COPD	188.724	75+
85	Women	Medium-low	NS 09 COPD	137.924	75+
85	Men	Medium-high	NS 09 COPD	83.152	75+
85	Women	Medium-high	NS 09 COPD	48.1817	75+
85	Men	High	NS 09 COPD	104.474	75+
85	Women	High	NS 09 COPD	42.3823	75+
85	Men	Low	NS Other (non-smoking-related)	54151.7	75+
85	Women	Low	NS Other (non-smoking-related)	88353.8	75+
85	Men	Medium-low	NS Other (non-smoking-related)	10421.4	75+
85	Women	Medium-low	NS Other (non-smoking-related)	14208.9	75+
85	Men	Medium-high	NS Other (non-smoking-related)	4836.4	75+
85	Women	Medium-high	NS Other (non-smoking-related)	4957.32	75+
85	Men	High	NS Other (non-smoking-related)	6788.51	75+
85	Women	High	NS Other (non-smoking-related)	4263.98	75+
90	Men	Low	SM 01 Cancer	1001.29	75+
90	Women	Low	SM 01 Cancer	158.811	75+
90	Men	Medium-low	SM 01 Cancer	203.956	75+
90	Women	Medium-low	SM 01 Cancer	49.7759	75+
90	Men	Medium-high	SM 01 Cancer	95.284	75+
90	Women	Medium-high	SM 01 Cancer	43.9756	75+
90	Men	High	SM 01 Cancer	121.826	75+
90	Women	High	SM 01 Cancer	27.2229	75+
90	Men	Low	SM 02 Cancer, others	1198.13	75+
90	Women	Low	SM 02 Cancer, others	99.6121	75+
90	Men	Medium-low	SM 02 Cancer, others	251.632	75+
90	Women	Medium-low	SM 02 Cancer, others	47.1263	75+
90	Men	Medium-high	SM 02 Cancer, others	111.478	75+
90	Women	Medium-high	SM 02 Cancer, others	34.7947	75+
90	Men	High	SM 02 Cancer, others	156.4	75+
90	Women	High	SM 02 Cancer, others	24.3245	75+
90	Men	Low	SM 03 IHD	1094.93	75+
90	Women	Low	SM 03 IHD	244.129	75+
90	Men	Medium-low	SM 03 IHD	233.278	75+
90	Women	Medium-low	SM 03 IHD	97.9913	75+
90	Men	Medium-high	SM 03 IHD	114.499	75+
90	Women	Medium-high	SM 03 IHD	72.2615	75+
90	Men	High	SM 03 IHD	161.149	75+
90	Women	High	SM 03 IHD	47.0771	75+
90	Men	Low	SM 04 Other Heart	1077.03	75+
90	Women	Low	SM 04 Other Heart	419.05	75+
90	Men	Medium-low	SM 04 Other Heart	216.256	75+
90	Women	Medium-low	SM 04 Other Heart	169.385	75+
90	Men	Medium-high	SM 04 Other Heart	102.288	75+
90	Women	Medium-high	SM 04 Other Heart	117.62	75+
90	Men	High	SM 04 Other Heart	143.172	75+
90	Women	High	SM 04 Other Heart	81.65	75+
90	Men	Low	SM 05 Cerebrovascular	437.708	75+
90	Women	Low	SM 05 Cerebrovascular	115.913	75+
90	Men	Medium-low	SM 05 Cerebrovascular	85.9023	75+
90	Women	Medium-low	SM 05 Cerebrovascular	51.3475	75+
90	Men	Medium-high	SM 05 Cerebrovascular	42.8668	75+
90	Women	Medium-high	SM 05 Cerebrovascular	38.6313	75+
90	Men	High	SM 05 Cerebrovascular	53.5238	75+
90	Women	High	SM 05 Cerebrovascular	21.3467	75+
90	Men	Low	SM 06 Other Vascular	393.695	75+
90	Women	Low	SM 06 Other Vascular	116.178	75+
90	Men	Medium-low	SM 06 Other Vascular	75.5712	75+
90	Women	Medium-low	SM 06 Other Vascular	45.4435	75+
90	Men	Medium-high	SM 06 Other Vascular	39.6924	75+
90	Women	Medium-high	SM 06 Other Vascular	28.7719	75+
90	Men	High	SM 06 Other Vascular	44.4566	75+
90	Women	High	SM 06 Other Vascular	19.2108	75+
90	Men	Low	SM 07 Diabetes	56.5347	75+
90	Women	Low	SM 07 Diabetes	14.1124	75+
90	Men	Medium-low	SM 07 Diabetes	11.0734	75+
90	Women	Medium-low	SM 07 Diabetes	5.21235	75+
90	Men	Medium-high	SM 07 Diabetes	4.584	75+
90	Women	Medium-high	SM 07 Diabetes	2.80627	75+
90	Men	High	SM 07 Diabetes	6.52573	75+
90	Women	High	SM 07 Diabetes	1.91178	75+
90	Men	Low	SM 08 IPT	711.971	75+
90	Women	Low	SM 08 IPT	84.4821	75+
90	Men	Medium-low	SM 08 IPT	144.067	75+
90	Women	Medium-low	SM 08 IPT	36.9492	75+
90	Men	Medium-high	SM 08 IPT	57.8264	75+
90	Women	Medium-high	SM 08 IPT	26.6748	75+
90	Men	High	SM 08 IPT	85.5851	75+
90	Women	High	SM 08 IPT	18.5263	75+
90	Men	Low	SM 09 COPD	3579.9	75+
90	Women	Low	SM 09 COPD	557.07	75+
90	Men	Medium-low	SM 09 COPD	611.266	75+
90	Women	Medium-low	SM 09 COPD	150.059	75+
90	Men	Medium-high	SM 09 COPD	239.81	75+
90	Women	Medium-high	SM 09 COPD	87.3757	75+
90	Men	High	SM 09 COPD	288.837	75+
90	Women	High	SM 09 COPD	66.2293	75+
90	Men	Low	SM Other (non-smoking-related)	0	75+
90	Women	Low	SM Other (non-smoking-related)	0	75+
90	Men	Medium-low	SM Other (non-smoking-related)	0	75+
90	Women	Medium-low	SM Other (non-smoking-related)	0	75+
90	Men	Medium-high	SM Other (non-smoking-related)	0	75+
[truncated: 243 more rows]
